# Supplementary material for: Experimental, theoretical, and astrochemical modelling investigation of the gas-phase reaction between the amidogen radical (NH2) and acetaldehyde (CH3CHO) at low temperatures
Source: Royal Society of Chemistry journal article supplement (doi:10.1039/d3fd00046j), 2023-01-01
Supplement: d3fd00046j1.pdf [file d3fd00046j1.pdf]

Experimental, theoretical, and modelling investigation of the gas-phase reaction  
between the amidogen radical ( $\text{NH}_2$ ) and acetaldehyde ( $\text{CH}_3\text{CHO}$ ) at low  
temperatures

Kevin M. Douglas<sup>a\*</sup>, Lok Hin Desmond Li<sup>a</sup>, Catherine Walsh<sup>b</sup>, Julia H. Lehman<sup>c</sup>, Mark A.  
Blitz<sup>a,d</sup>, Dwayne E. Heard<sup>a\*</sup>

<sup>a</sup>*School of Chemistry, University of Leeds, Leeds, LS2 9JT, UK*

<sup>b</sup>*School of Physics and Astronomy, University of Leeds, Leeds, LS2 9JT, UK*

<sup>c</sup>*School of Chemistry, University of Birmingham, Edgbaston, B15 2TT, UK*

<sup>d</sup>*National Centre for Atmospheric Science (NCAS), University of Leeds, Leeds, LS2 9JT, UK*

\*corresponding authors. Email: [k.m.douglas@leeds.ac.uk](mailto:k.m.douglas@leeds.ac.uk); [d.e.heard@leeds.ac.uk](mailto:d.e.heard@leeds.ac.uk)

**Supplementary Information**

### 33 Introduction

#### 34 S1. A brief introduction to the low-temperature kinetics of gas-phase reactions, to the 35 astrochemistry of acetamide, and to the related reaction between $\text{NH}_2$ and formaldehyde.

36 An active field of astrochemical research remains the understanding of the reaction  
37 mechanisms for the formation of complex organic molecules (COMs), which are molecules  
38 observed in space containing carbon with at least 6 atoms.<sup>4</sup> Since the early 1960s, the  
39 development of ground based radio astronomy has led to a rapid rate of detection of COMs  
40 with a wide range of functional groups in the interstellar medium (ISM).<sup>5</sup> The detection of  
41 COMs at very high spatial resolution in cold objects suggests a gas-phase route to their  
42 formation rather than just *via* a pure surface-grain chemistry mechanism.<sup>6</sup> However, the  
43 mechanisms for forming many gas-phase COMs are still unknown, with both gas-phase and  
44 grain-surface (*via* non-thermal desorption) routes possible.

45 Many gas-phase reactions leading either to the removal or formation of COMs possess  
46 an activation barrier on their potential energy surface, and the Arrhenius equation  
47  $k = A \exp(-E_a/RT)$  would suggest a rate coefficient,  $k$ , which becomes vanishingly small at the  
48 very low temperatures encountered in interstellar environments. However, in our laboratory,  
49 we have discovered that for a significant number of reactions of OH with oxygenated organic  
50 compounds that contain activation barriers,  $k$  can increase dramatically at very low  
51 temperatures.<sup>7-8</sup> The explanation is the formation of a weakly-bound ( $\sim 5\text{--}30 \text{ kJ mol}^{-1}$ )  
52 hydrogen-bonded complex in the entrance channel to the reaction before the transition state  
53 (TS), which is sufficiently long-lived to undergo quantum mechanical tunnelling to form  
54 products. At sufficiently low temperatures the rate of dissociation of the pre-reaction complex  
55 (PRC) back to reactants becomes sufficiently small that the probability of quantum mechanical  
56 tunnelling to products under the barrier becomes much higher. The first and most studied  
57 example of this behaviour is the gas-phase reaction of OH with methanol, for which there are  
58 now several experimental kinetics studies at very low temperatures down to 11.7 K,<sup>8-12</sup> as well  
59 as theoretical calculations of the rate coefficients.<sup>12-14</sup> The reaction proceeds *via* abstraction of  
60 a hydrogen atom at either the methyl (to form  $\text{CH}_2\text{OH}$ ) or the hydroxyl site (to form  $\text{CH}_3\text{O}$ ),  
61 with activation barriers of 4.2 and 15.0  $\text{kJ mol}^{-1}$ , respectively. The PRC is calculated to be  
62 bound by 20.5  $\text{kJ mol}^{-1}$ , and a rapid increase in the rate coefficient was measured below 200  
63 K, with  $k(22\text{K})/k(200 \text{ K}) \sim 100$ , a trend which could be reproduced with some success using  
64 reaction rate theory.<sup>10, 13-15</sup> The  $\text{CH}_3\text{O}$  product was observed experimentally, providing direct  
65 evidence for the mechanism, and formed *via* tunnelling under the higher barrier, consistent  
66 with theory which calculated a much higher imaginary frequency for the tunnelling motion to  
67 form  $\text{CH}_3\text{O}$  compared to forming  $\text{CH}_2\text{OH}$ . Astronomical abundances of the methoxy radical,  
68  $\text{CH}_3\text{O}$ , can be reproduced more accurately by chemical models if the gas-phase reaction  $\text{OH} +$   
69  $\text{CH}_3\text{OH} \rightarrow \text{CH}_3\text{O} + \text{H}_2\text{O}$  is included using the measured rate at very low temperatures.<sup>9, 16</sup>

70 The formation of biomolecules such as amino acids from COMs under pre-biotic  
71 conditions has attracted much interest.<sup>17</sup> The amino acid glycine ( $\text{NH}_2\text{CH}_2\text{COOH}$ ), a building  
72 block for proteins which are essential components of all living systems, has been observed in  
73 the coma of a comet.<sup>18</sup> The peptide bond ( $\text{NH-C=O}$ ) plays a key role in linking of amino acids  
74 into peptide chains and proteins, it contains all the components necessary for the formation of

nucleic polymers under prebiotic conditions.<sup>1</sup> However, only two molecules containing this bond have been observed in space, formamide,  $\text{NH}_2\text{CHO}$ <sup>2</sup> and acetamide,  $\text{NH}_2\text{C}(\text{O})\text{CH}_3$ .<sup>3</sup>

In a previous paper<sup>19</sup> we studied the low-temperature kinetics of the gas-phase neutral-neutral reaction of the amidogen radical,  $\text{NH}_2$ , and formaldehyde ( $\text{CH}_2\text{O}$ , ubiquitously found in space),  $\text{NH}_2 + \text{CH}_2\text{O} \rightarrow \text{NH}_2\text{CHO} + \text{H}$ , which had been suggested in theoretical studies as a viable route to form the simplest carboxylic acid amide, formamide,  $\text{NH}_2\text{CHO}$ .<sup>20-22</sup> There are two main exothermic product channels for this reaction; a hydrogen-abstraction channel in which the  $\text{NH}_2$  abstracts an H atom from formaldehyde to produce ammonia,  $\text{NH}_3$ , and the formyl radical,  $\text{CHO}$ , and an addition-elimination channel in which the  $\text{NH}_2$  first attacks the C of the formaldehyde to form a bound adduct, which then goes on to eliminate an H atom and produce formamide. Previous theoretical calculations of this reaction reached different conclusions. One study,<sup>21</sup> in which the authors argue for omitting the barrier to adduct formation, predicts the reaction leading to formamide formation to have an inverse temperature dependence, with the rate coefficient becoming large at  $\sim 3 \times 10^{-10} \text{ cm}^3 \text{ molecule}^{-1} \text{ s}^{-1}$  at 10 K. Another theoretical study<sup>23</sup> found that when zero-point energy was included there was a significant barrier to adduct formation and the  $\text{NH}_2 + \text{CH}_2\text{O}$  reaction does not play a significant role in formation of formamide. Using a pulsed Laval nozzle apparatus equipped with laser-flash photolysis and laser-induced fluorescence spectroscopy we made the first experimental study of the low-temperature rate coefficient for this reaction.<sup>19</sup> No loss of  $\text{NH}_2$  could be observed via reaction with  $\text{CH}_2\text{O}$ , and we placed an upper limit on the rate coefficient of  $< 6 \times 10^{-12} \text{ cm}^3 \text{ molecule}^{-1} \text{ s}^{-1}$  at 34 K. We combined ab initio calculations of the potential energy surface with Rice–Rampsberger–Kassel–Marcus (RRKM) calculations to predict a rate coefficient of  $6.2 \times 10^{-14} \text{ cm}^3 \text{ molecule}^{-1} \text{ s}^{-1}$  at 35 K, consistent with the experimental results. The presence of a significant barrier,  $18 \text{ kJ mol}^{-1}$ , for the formation of formamide as a product, a channel for which tunnelling is not possible, means that only the H-abstraction channel producing  $\text{NH}_3 + \text{CHO}$ , in which the transfer of an H atom can occur by quantum mechanical tunnelling through a  $23 \text{ kJ mol}^{-1}$  barrier, is open at low temperatures.<sup>19</sup> The calculated rate coefficients were used in an astrochemical model, which demonstrated that this reaction produces only negligible amounts of gas-phase formamide under interstellar and circumstellar conditions. We concluded therefore that the gas-phase reaction of  $\text{NH}_2$  with  $\text{CH}_2\text{O}$  is not an important source of formamide at low temperatures in interstellar environments.<sup>19</sup>

In this paper we have performed an experimental and theoretical study of the kinetics of the reaction of  $\text{NH}_2$  with acetaldehyde, the next aldehyde in the homologous series after formaldehyde, for which there are three energetically favourable channels ( $\Delta H$  calculated in this study, see Section 4):

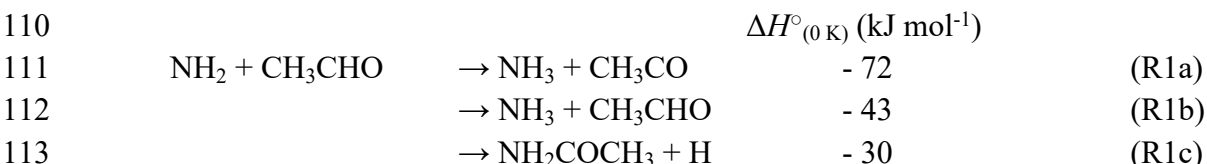

Reaction R1 therefore is both a potential source of gas-phase organic radicals ( $\text{CH}_3\text{CO}$  and  $\text{CH}_2\text{CHO}$  via reactions R1a and R1b respectively), and of acetamide ( $\text{NH}_2\text{COCH}_3$ , via reaction R1c), the largest interstellar molecule with a peptide bond that has so far been observed in space. Acetamide was first detected in the interstellar medium in 2006 by Hollis, *et al.*<sup>3</sup> in both absorption and emission at radio frequencies toward the star-forming region Sagittarius B2(N)

119 with the 100 m Green Bank Telescope, within a cold halo region at  $\sim 8$  K. Hollis, *et al.*<sup>3</sup>  
 120 suggested that the exothermic but spin-forbidden gas-phase radiative-association reaction  
 121  $\text{NH}_2\text{CHO} + \text{CH}_2 \rightarrow \text{CH}_3\text{CONH}_2 + h\nu$  may account for acetamide formation in this region, but  
 122 stated that as there may be an activation barrier (likely  $> 10$  kJ mol<sup>-1</sup>), a transient thermal shock  
 123 known to be prevalent in this star-forming region, was needed to overcome the barrier. Further  
 124 observations of acetamide towards Sgr B2(N) were made by Halfen, *et al.*<sup>24</sup>, who hypothesised  
 125 that the similarity in the abundances and spatial distribution of formamide and acetamide in  
 126 this region suggested a synthetic connection between the two species. The abundance of  
 127 acetamide was similar to that of acetaldehyde, so was one of the most abundant COMs in Sgr  
 128 B2(N). Acetamide was first observed on a comet via mass spectrometry following the  
 129 touchdown in 2014 of the Philae lander on comet 67P/Churyumov–Gerasimenko.<sup>18, 25-26</sup>  
 130 Acetamide could also be formed on ice mantles of interstellar grains, for example by the  
 131 addition of  $\text{CH}_3$  to  $\text{HNCO}$  with subsequent hydrogenation;<sup>24</sup> however, in cold clouds at around  
 132 10 K desorption of the refractory acetamide into the gas-phase seems unlikely.

133 Although some ion-molecule reactions, electron-molecule recombinations and neutral-  
 134 neutral reactions have been suggested for interstellar acetamide formation,<sup>24, 27</sup> the low  
 135 temperature behaviour of the neutral-neutral gas-phase reaction  $\text{NH}_2 + \text{CH}_3\text{CHO}$  as a source is  
 136 unexplored, with only one kinetics study performed for this reaction at higher temperatures  
 137 between 297 – 543 K. This study<sup>28</sup> reported an Arrhenius-type behaviour for the rate coefficient,  
 138 with a best-fit to the data giving  $k(T) = 3.48 \times 10^{-13} \exp[(-10400 \pm 200)/RT]$  cm<sup>3</sup> molecule<sup>-1</sup> s<sup>-1</sup>,  
 139 with  $k(298 \text{ K}) = 5.18 \times 10^{-15}$  cm<sup>3</sup> molecule<sup>-1</sup> s<sup>-1</sup> and an activation energy for H-atom  
 140 abstraction of 10.4 kJ mol<sup>-1</sup>.

141

142

143

144

145

146

147

148

149

150

151

152

153

154

155

156

## 157 Methodology

### 158 S2. Additional Details on the Experimental Setup

159 The use of a Laval nozzle expansion coupled with a PLP-LIF technique has been  
160 employed by this group to study a range of low temperature neutral-neutral reactions, including  
161 reactions of OH with unsaturated hydrocarbons<sup>29</sup> and VOCs,<sup>8, 11, 15, 30</sup>  $^1\text{CH}_2$  (singlet methylene)  
162 with atmospheric gases and hydrocarbons,<sup>31-32</sup> CH with  $\text{CH}_2\text{O}$ ,<sup>33</sup> and  $\text{NH}_2$  with  $\text{CH}_2\text{O}$ .<sup>19</sup> In the  
163 current study, we employ the same technique to study the low temperature reaction of  $\text{NH}_2$   
164 with  $\text{CH}_3\text{CHO}$ . As the experimental apparatus employed in the current and previous studies  
165 has been discussed in detail elsewhere,<sup>8, 11, 29-30</sup> only a brief overview is given here.

166 The low temperatures employed in this study were obtained by the isentropic expansion  
167 of a gas mixture from a high pressure reservoir to a low pressure chamber through a Laval  
168 nozzle, producing a thermalized low temperature gas flow that is stable for several centimetres  
169 from the nozzle exit. The gas mixture is pulsed into the  $1\text{ cm}^3$  reservoir from a high-pressure  
170 ballast by two pulsed solenoid valves (Parker 9 series), fired at a pulse repetition rate of either  
171 5 or 10 Hz, with a pulse duration of around 10 ms. A set of 4 nozzles were used during the  
172 experiments to achieve flow temperatures of between 29 and 107 K. The density and  
173 temperature profile of the flows were characterized by impact pressure measurements, and the  
174 temperature of several of the uniform flows confirmed by rotationally resolved LIF  
175 spectroscopy.<sup>31, 33</sup>

176 The gas mixture introduced to the reservoir consists primarily of an inert bath gas (Ar  
177 (99.9995 %, BOC), He (99.9995 %, BOC), or  $\text{N}_2$  (99.9995 %, BOC)), together with smaller  
178 amounts of the  $\text{NH}_2$  precursor ( $\text{NH}_3$  (99.98 %, BOC)), the  $\text{CH}_3\text{CHO}$  co-reagent (Sigma-  
179 Aldrich,  $\geq 99.0\%$ ), and  $\text{CH}_4$  (99.995 %, BOC). These reagent and bath gases were combined  
180 in the required quantities in a mixing manifold using calibrated mass flow controllers (MFCs;  
181 MKS Instruments). Both the bath gases and the  $\text{CH}_4$  were introduced as pure gases, while the  
182  $\text{NH}_3$  was introduced as a dilute mixture of  $\sim 10\%$  in Ar. The dilute  $\text{NH}_3$  flow typically  
183 accounted for less than  $0.2\%$  of the total flow, resulting in  $\sim 0.02\%$   $\text{NH}_3$  present in the gas  
184 expansions. The  $\text{CH}_3\text{CHO}$  co-reagent was introduced by entraining  $\text{CH}_3\text{CHO}$  vapour in a flow  
185 of the bath gas passing through a glass bubbler (a modified Dreschel bottle) containing  
186  $\text{CH}_3\text{CHO}$  liquid. The bubbler, which was maintained at  $0\text{ }^\circ\text{C}$  using an ice bath, was located  
187 before the relevant mass flow controller. By measuring the pressure of the bath gas over the  
188  $\text{CH}_3\text{CHO}$ , the concentration of  $\text{CH}_3\text{CHO}$  entrained in the gas flow was determined *via* its  
189 known vapour pressure at  $0\text{ }^\circ\text{C}$ .<sup>34</sup> In practice, the vapour pressure of the  $\text{CH}_3\text{CHO}$  in the  
190 bubbler, as measured by a pressure gauge (Druck DPI 104), was shown to reduce over time,  
191 suggesting the slow formation of larger oxygenated and low volatility hydrocarbons from the  
192  $\text{CH}_3\text{CHO}$ . Thus, the vapour pressure of the  $\text{CH}_3\text{CHO}$  as measured each day was used to  
193 calculate the  $\text{CH}_3\text{CHO}$  concentration entrained in the gas flow, and the  $\text{CH}_3\text{CHO}$  replaced  
194 regularly. This concentration of  $\text{CH}_3\text{CHO}$  in the flow was confirmed by UV absorption  
195 spectroscopy, carried out using 253.7 nm light from a Hg Pen-ray lamp, a 1 m length absorption  
196 cell, and a PMT (Hamamatsu type H9306-13) fitted with a monochromator set at 253.7 nm  
197 (Minichrom, 300  $\mu\text{m}$  slits) and connected to a digital oscilloscope (LeCroy LT262). The  
198 absorption cell was located after the mixing manifold and prior to the gas ballast, and the  
199  $\text{CH}_3\text{CHO}$  concentrations determined using an absorption cross section of  $1.6 \times 10^{-20}\text{ cm}^2$

200 molecule<sup>-1</sup> as taken from the MPI-Mainz Spectral Atlas.<sup>35</sup> The calculated and measured  
201 CH<sub>3</sub>CHO concentrations were typically within 20 % of each other.

202 In previous studies, the reagent and precursor gases were mixed with the bath gas in a  
203 mixing manifold before entering the gas ballast. However, it was found that when gas flows  
204 containing NH<sub>3</sub> with formaldehyde co-reagent were mixed,<sup>19</sup> a misty film would form on the  
205 windows of the absorption cell, causing inaccuracies in the absorption spectroscopy  
206 measurements. This film was attributed to the formation of a salt from the reaction of the basic  
207 NH<sub>3</sub> with the slightly acidic formaldehyde, and as such the NH<sub>3</sub> precursor flow was redirected  
208 so that it only mixed with the other gas flows just before entering the gas ballast, after the other  
209 gases had passed through the absorption cell. As we would expect the same issue to arise  
210 between NH<sub>3</sub> and CH<sub>3</sub>CHO, the same flow setup was adopted in these experiments. Indeed, in  
211 our experiments we do observe a decrease in the NH<sub>2</sub> LIF signal with increasing CH<sub>3</sub>CHO  
212 concentrations (which is not the result of quenching of the NH<sub>2</sub> fluorescence signal by  
213 CH<sub>3</sub>CHO, as the NH<sub>2</sub> fluorescence lifetime does not appear to change significantly as we add  
214 CH<sub>3</sub>CHO), suggesting some reaction between NH<sub>3</sub> and CH<sub>3</sub>CHO is occurring either in the  
215 ballast tank and/or the low temperature expansion. Despite this we still observed satisfactory  
216 NH<sub>2</sub> LIF signal even at high CH<sub>3</sub>CHO concentrations, indicating that sufficient NH<sub>3</sub> remained  
217 in the gas-flow to be photolyzed. No corrections to the CH<sub>3</sub>CHO concentrations were made to  
218 account for this reaction, as the CH<sub>3</sub>CHO concentrations used in our experiments were  
219 typically far in excess of the NH<sub>3</sub> concentrations.

220 NH<sub>2</sub> radicals were generated from the PLP of NH<sub>3</sub> at 213 nm (Reaction R2) by the 5<sup>th</sup>  
221 harmonic of a Nd:YAG laser (Quantel Q-Smart 850), with a typical pulse energy of ~10 mJ.  
222 The photolysis laser was introduced co-linearly with the axis of the expanded gas flow, to  
223 produce a uniform radical density. NH<sub>2</sub> radicals were observed by time-resolved LIF  
224 spectroscopy, probing the  $A^2A_1(0,9,0) \leftarrow X^2B_1(0,0,0)$  transition near 597.7 nm<sup>36-37</sup> using the  
225 output of Nd:YAG pumped dye laser (a Quantel Q-smart 850 pumping a Sirah Cobra-Stretch).  
226 The probe laser was introduced perpendicularly to the photolysis laser beam, crossing the gas  
227 flow at the furthest distance from the exit of the nozzle before the flow broke up due to  
228 turbulence (typically between 8 and 30 cm depending on the nozzle and bath gas). The non-  
229 resonant fluorescence at ~ 620 nm was collected *via* a series of lenses through an optical filter  
230 (Semrock Brightline interference filter,  $\lambda_{\text{max}} = 620$  nm, fwhm = 14 nm), and observed by a  
231 temporally gated channel photomultiplier (CPM; PerkinElmer C1952P), mounted at 90° to  
232 both laser beams. The signal from the CPM was recorded using a digital oscilloscope (LeCroy  
233 Waverunner LT264), whose output was sent to a computer using a custom LabView program.  
234 The temporal evolution of the LIF signal was recorded by varying the time delay between the  
235 photolysis and probe lasers. A typical time-resolved LIF profile (Figure 1) consisted of 165  
236 delay steps and resulted from the average or between 5 and 15 individual delay scans.

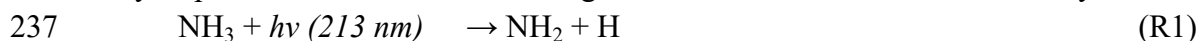

238 Photolysis of NH<sub>3</sub> produces both ground and vibrationally excited NH<sub>2</sub>,<sup>37-38</sup> and as a  
239 consequence of this the profiles of NH<sub>2</sub> ( $v = 0$ ) exhibit a growth resulting from the relaxation  
240 of vibrationally excited NH<sub>2</sub> (see Figure 1). As has been discussed previously,<sup>19</sup> this poses a  
241 problem for conducting kinetics measurements of NH<sub>2</sub> in our system, as the timescale for  
242 kinetic experiments is restricted by the length of the uniform supersonic flow, with dynamic  
243 times in our system ranging from ~ 100 to 500  $\mu\text{s}$  depending on the nozzle and bath gas used.

244 By adding up to 3 % CH<sub>4</sub>, which has been shown to efficiently relax vibrationally excited NH<sub>2</sub>  
245 whilst not changing the conditions of the uniform expansion, to our low temperature flows, we  
246 were able to increase the initial growth rate of the NH<sub>2</sub> ( $\nu = 0$ ) signal, thus increasing the  
247 effective timescale in which we can monitor the loss the NH<sub>2</sub> ( $\nu = 0$ ) signal.

248 Experiments looking at the dimerization of CH<sub>3</sub>CHO at low temperatures were  
249 conducted using the same experimental apparatus as described above. CH<sub>3</sub>CHO has a broad  
250 absorption feature between  $\sim 230$  and  $345$  nm.<sup>39</sup> CH<sub>3</sub>CHO was observed by probing the  $^3(n,\pi^*)$   
251  $A\ ^3A'' \leftarrow X\ ^1A'$  transition within this feature at  $308.0$  nm, using the frequency doubled output  
252 of a Nd:YAG pumped dye laser (same system as described above with a BBO doubling  
253 crystal). The non-resonant fluorescence at  $\lambda > 390$  nm was discriminated using a long pass  
254 Perspex filter.

255 Some additional experiments were also carried out observing the production of OH  
256 radicals from the reaction of CH<sub>3</sub>CO with O<sub>2</sub> (R4), in order to obtain the yield of CH<sub>3</sub>CO  
257 produced from reaction R1 (*via* channel R1a). As a part of these experiments, the temporal  
258 removal of OH by CH<sub>3</sub>CHO, both with and without O<sub>2</sub> present, was also recorded, with the  
259 OH produced by the PLP of tert-butyl hydrogen peroxide ((CH<sub>3</sub>)<sub>3</sub>COOH; tBuOOH). These  
260 experiments were all conducted using the same experimental apparatus as described above.  
261 The tBuOOH precursor was introduced in the same method as the CH<sub>3</sub>CHO co-regent, by  
262 entraining its vapour in a flow of bath gas passing through a bubbler containing tBuOOH liquid  
263 (Alfa-Aesar, 90 % aqueous solution). The concentration of tBuOOH in our low temperature  
264 flows was estimated using its known vapour pressure at room temperature, and typically  
265 accounted for  $< 0.1$  % of the total flow. These concentrations of tBuOOH were too low to  
266 measure directly by absorption spectroscopy, however by carrying out absorbance  
267 measurements at higher flows of tBuOOH we were able to produce a calibration plot of the  
268 tBuOOH concentration *vs* MFC flow rate, and use the flow rate to determine tBuOOH  
269 concentrations when they were too low for absorbance measurements. An absorption cross  
270 section of  $1.5 \times 10^{-20}$  cm<sup>2</sup> molecule<sup>-1</sup> for tBuOOH at  $253.7$  nm, as taken from the MPI-Mainz  
271 Spectral Atlas,<sup>35</sup> was used for these measurements. OH radicals were observed by probing the  
272  $A\ ^2\Sigma^+ (\nu' = 0) \leftarrow X\ ^2\Pi (\nu'' = 0)$  transition at  $\sim 307.9$  nm, using the laser system as described  
273 above. The resonant fluorescence was collected using a gated PMT, in which the scattered laser  
274 probe light was gated out, and fitted with an interference filter centred at  $308.5$  nm (Barr  
275 Associates, fwhm = 5nm).

276

277

278

279

280

281

282

283

## 284 Experimental Rate Coefficients for the reaction $\text{NH}_2 + \text{CH}_3\text{CHO}$

285

286 **Figure S3.** Temperature dependent rate coefficients for the reaction between  $\text{NH}_2 + \text{CH}_3\text{CHO}$   
 287 (R1). As we are unable to simply dial up temperatures and pressures in our experiments, we  
 288 are unable to vary the temperature while keeping the pressure constant. Instead, to demonstrate  
 289 the temperature dependence, we have grouped together data collected at the same approximate  
 290 density and collected in the same bath gas. See Table 1 in the main text for full set of  
 291 temperatures and pressures employed.

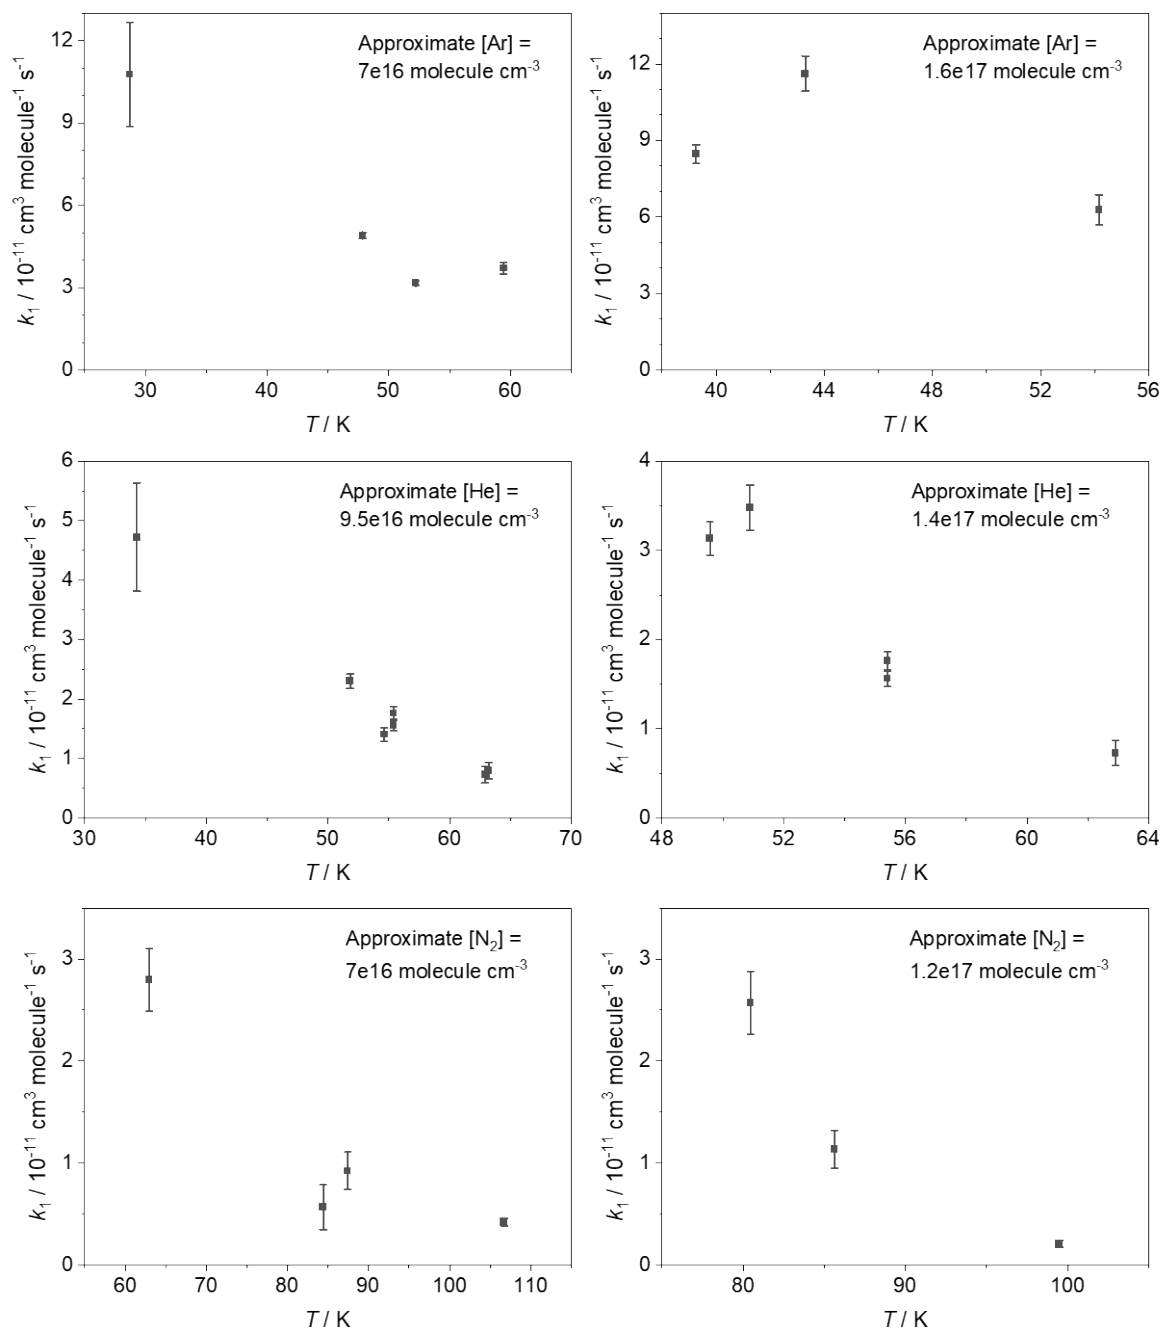

292

293

294 **Figure S4.** Pressure dependent rate coefficients for the reaction between  $\text{NH}_2 + \text{CH}_3\text{CHO}$  (R1),  
 295 collected in Ar (top panel), He (middle panel), and  $\text{N}_2$  (bottom panel). The approximate  
 296 temperatures (as it is slightly different for each pressure, see Table x) the measurements were  
 297 made at are shown in the legends.

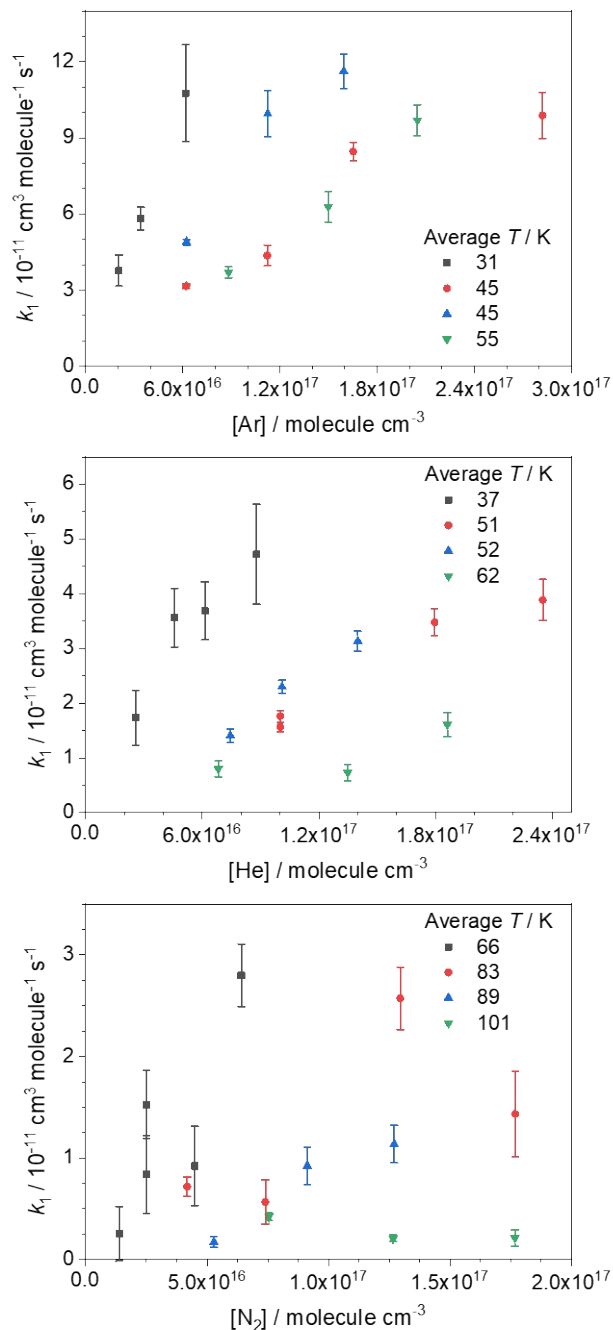

298

299

300

301

302

303

## 304 Determination of Experimental OH / CH<sub>3</sub>CO Yields

305

306 **Figure S5.** OH traces collected at 67.1 K, a total N<sub>2</sub> density of  $2.5 \times 10^{16}$  molecule cm<sup>-3</sup>, and  
 307 [CH<sub>3</sub>CHO] of 1.9, 3.0 and  $5.3 \times 10^{13}$  molecule cm<sup>-3</sup> (black squares, red triangles, and blue  
 308 circles respectively). Solid lines are the least squares fitting of a single exponential fit to the  
 309 traces from which  $k'_{\text{obs}}$  is obtained:

$$310 \quad [OH]_t = [OH]_0 \cdot \exp(-k'_{\text{obs}} \cdot t)$$

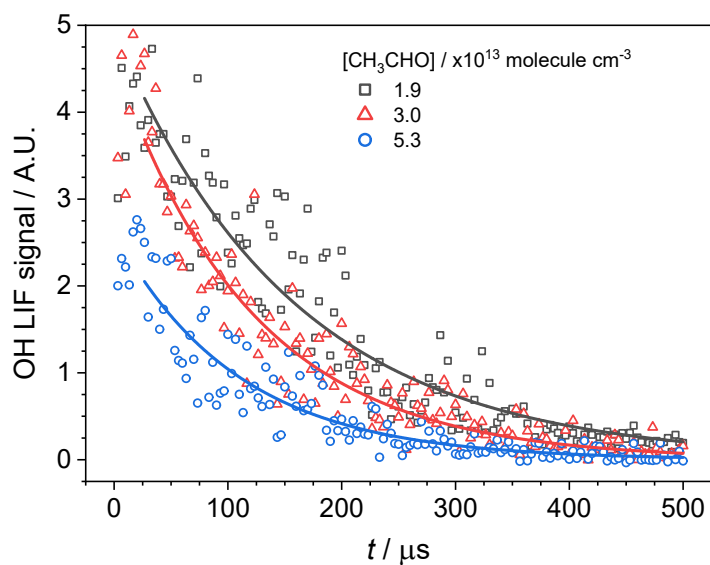

311

312

313

314

315

316

317

318

319

320

321

322

323

324

325

326

## 327 S6. Further details on CH<sub>3</sub>CO yield determinations

328

329 To address the first issue in determining the yield for CH<sub>3</sub>CO production from R1, that  
 330 is understanding how many OH radicals have been produced relative to the initial number of  
 331 NH<sub>2</sub> radicals produced, we used the following procedure. Note, the figures and tables presented  
 332 in this section are not cited in the main text, but are given here for completeness.

333

- 334 1. The OH LIF signal is calibrated using a known concentration of tBuOOH ( $1.06 \times 10^{12}$   
 335 molecule cm<sup>-3</sup>), and its absorption cross-section at 213 nm ( $\sigma = 8.5 \times 10^{-20}$  cm<sup>2</sup>  
 336 molecule<sup>-1</sup>).<sup>35</sup>

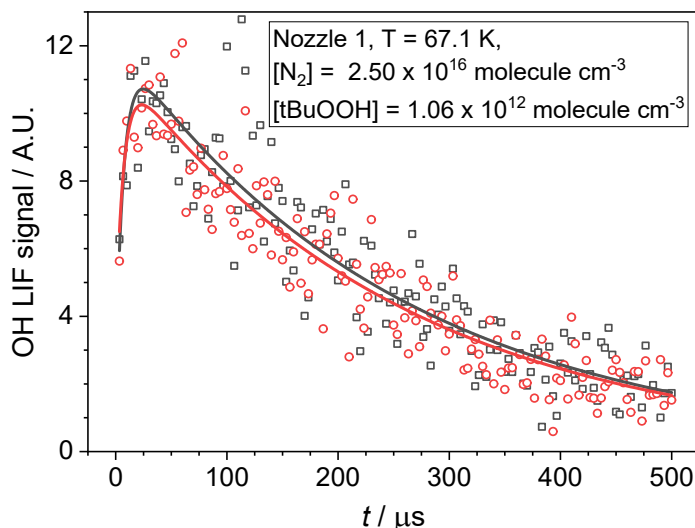

337

338  $f_{OH}$ , the observed OH fluorescence signal, is extracted from a bi-exponential fit to the  
 339 OH LIF signal. From the above figure, using the equation below, we extract an  $f_{OH} =$   
 340 11.6 A.U. Black and red traces are repeats of the same experiment.

$$341 \quad [OH]_t = f_{OH} \left( \frac{k'_{growth}}{k'_{loss} - k'_{growth}} \right) [OH^*]_0 \left( e^{-k'_{growth}t} - e^{-k'_{loss}t} \right) + [OH]_0 e^{-k'_{loss}t}$$

342 Product of  $[tBuOOH] \times \sigma(tBuOOH) = n \cdot \sigma \text{ tBuOOH} = 8.99 \times 10^{-8} \text{ cm}^{-1}$ .

343

- 344 2. Get  $f_{OH}$  from the OH yield experiments in which NH<sub>3</sub> is photolysed in the presence of  
 345 CH<sub>3</sub>CHO and O<sub>2</sub>, again from a bi-exponential fit to the data. Same conditions as above  
 346 (Nozzle 1, T = 67.1 K,  $[N_2] = 2.50 \times 10^{16}$  molecule cm<sup>-3</sup>, same photolysis energy and  
 347 PMT settings).

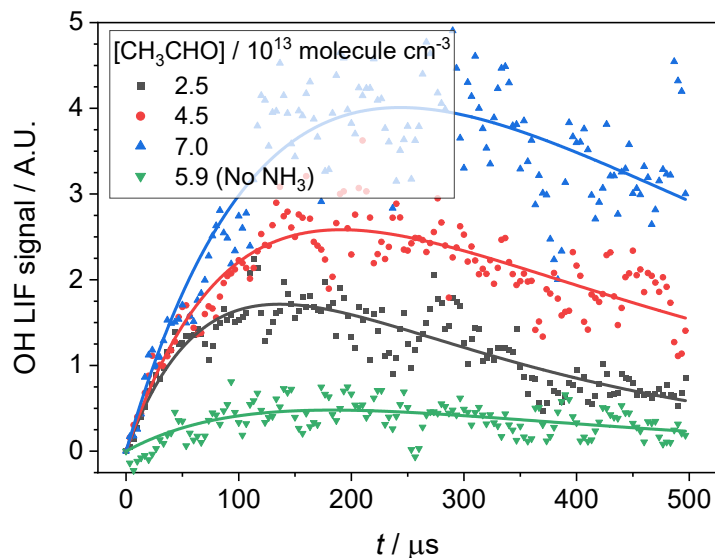

We can compare these  $f_{\text{OH}}$  values to that from tBuOOH and calculate an effective [tBuOOH] that would give this signal, and calculate effective  $n\sigma$  tBuOOH.

| $[\text{CH}_3\text{CHO}] / \times 10^{13}$<br>molecule $\text{cm}^{-3}$ | $f_{\text{OH}}$ | Ratio $f_{\text{OH}}$ from $\text{NH}_2$ :<br>$f_{\text{OH}}$ from tBuOOH | Effective [tBuOOH] /<br>$\times 10^{11}$ molecule $\text{cm}^{-3}$ | $n\sigma$ tBuOOH<br>/ $\times 10^{-8} \text{ cm}^{-1}$ |
|-------------------------------------------------------------------------|-----------------|---------------------------------------------------------------------------|--------------------------------------------------------------------|--------------------------------------------------------|
| 2.50                                                                    | 2.98            | 0.26                                                                      | 2.72                                                               | 2.31                                                   |
| 4.50                                                                    | 4.30            | 0.37                                                                      | 3.92                                                               | 3.33                                                   |
| 7.00                                                                    | 8.34            | 0.72                                                                      | 7.60                                                               | 6.46                                                   |

- Determine how much  $\text{NH}_2$  relates to each of these OH signals. This can be estimated from the concentration of  $\text{NH}_3$  in our experiments and its absorbance cross-section at 213 nm ( $\sigma = 2.0 \times 10^{-18} \text{ cm}^2 \text{ molecule}^{-1}$ ).<sup>35</sup> These experiments were carried out with  $[\text{NH}_3] = 9.5 \times 10^{12} \text{ molecule cm}^{-3}$ . However, from experiments observing  $\text{NH}_2$  removal with  $\text{CH}_3\text{CHO}$ , we see the  $\text{NH}_2$  LIF signal,  $f_{\text{NH}_2}$ , decreasing with increasing  $\text{CH}_3\text{CHO}$ , suggesting some of the  $\text{NH}_3$  is lost to reaction with  $\text{CH}_3\text{CHO}$  prior to the expansion through the Laval nozzle. The reduction in  $\text{NH}_3$  with  $\text{CH}_3\text{CHO}$  can be determined by looking at the reduction in the  $\text{NH}_2$  signal with  $\text{CH}_3\text{CHO}$  compared to the  $\text{NH}_2$  signal with no  $\text{CH}_3\text{CHO}$  (again for experiments conducted under the same conditions, Nozzle 1,  $T = 67.1 \text{ K}$ ,  $[\text{N}_2] = 2.50 \times 10^{16} \text{ molecule cm}^{-3}$ , same photolysis energy). This was done by fitting a single exponential loss to the  $f_{\text{NH}_2}$  values and using this fit to determine the reduction in  $f_{\text{NH}_2}$  with  $\text{CH}_3\text{CHO}$ .

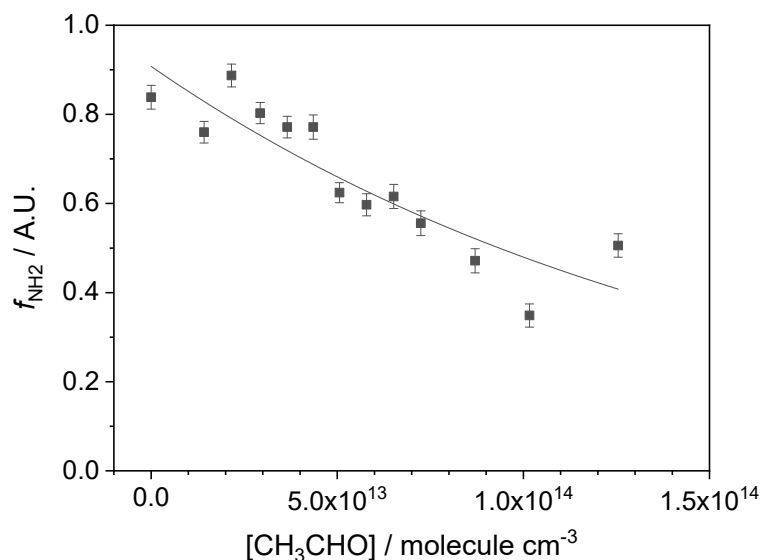

4. With both the concentration and absorption cross section of  $\text{NH}_3$  we can calculate the  $n.\sigma$  product. Finally, comparing the  $n.\sigma$  products for  $\text{tBuOOH}$  and  $\text{NH}_3$  we can determine the ratio of  $\text{NH}_2$  radicals that were converted into  $\text{OH}$  radicals.

| $[\text{CH}_3\text{CHO}] / \times 10^{13}$<br>molecule $\text{cm}^{-3}$ | Ratio $\text{NH}_2$ signal with<br>$\text{CH}_3\text{CHO}$ to without<br>$\text{CH}_3\text{CHO}$ | $[\text{NH}_3] / \times 10^{12}$<br>molecule $\text{cm}^{-3}$ | $n.\sigma \text{ NH}_3 / \times$<br>$10^{-5} \text{ cm}^{-1}$ | Ratio<br>$\text{NH}_2 : \text{OH}$ |
|-------------------------------------------------------------------------|--------------------------------------------------------------------------------------------------|---------------------------------------------------------------|---------------------------------------------------------------|------------------------------------|
| 2.50                                                                    | 0.85                                                                                             | 8.10                                                          | 1.62                                                          | 701:1                              |
| 4.50                                                                    | 0.75                                                                                             | 7.13                                                          | 1.43                                                          | 428:1                              |
| 7.00                                                                    | 0.64                                                                                             | 6.08                                                          | 1.22                                                          | 188:1                              |

5. Determine how much  $\text{NH}_2$  in each experiment is actually removed by  $\text{CH}_3\text{CHO}$ , rather than from diffusional losses. This can be determined from experiments observing the loss of  $\text{NH}_2$  with  $\text{CH}_3\text{CHO}$ , again conducted under the same conditions ( $T = 67.1 \text{ K}$ ,  $[\text{N}_2] = 2.50 \times 10^{16} \text{ molecule cm}^{-3}$ ) from which we obtain a rate coefficient of  $k_1 = 1.19 \times 10^{-11} \text{ cm}^3 \text{ molecule}^{-1} \text{ s}^{-1}$ . Using this we can correct the product of  $n.\sigma$  for  $\text{NH}_3$ , and finally determine the ratio of  $\text{NH}_2$  radicals that are removed by  $\text{CH}_3\text{CHO}$  that were converted in  $\text{OH}$  radicals.

| $[\text{CH}_3\text{CHO}] / \times 10^{13}$<br>molecule $\text{cm}^{-3}$ | $k'$ diffusion<br>$/ \text{ s}^{-1}$ | $k' \text{ CH}_3\text{CHO} /$<br>$\text{ s}^{-1}$ | % $\text{NH}_2$ removal<br>with $\text{CH}_3\text{CHO}$ | Corrected $n.\sigma$<br>$\text{NH}_3 / \times 10^{-7} \text{ cm}^{-1}$ | Ratio $\text{NH}_2 :$<br>$\text{OH}$ |
|-------------------------------------------------------------------------|--------------------------------------|---------------------------------------------------|---------------------------------------------------------|------------------------------------------------------------------------|--------------------------------------|
| 2.50                                                                    | 4600                                 | 296                                               | 6.1                                                     | 9.8                                                                    | 42:1                                 |
| 4.50                                                                    | 4600                                 | 533                                               | 10.4                                                    | 14.8                                                                   | 44:1                                 |
| 7.00                                                                    | 4600                                 | 830                                               | 15.3                                                    | 18.6                                                                   | 29:1                                 |

As can be seen from the above table, there is reasonable agreement in the amount of  $\text{OH}$  converted per  $\text{NH}_2$  radical (the final column which is the ratio  $\text{NH}_2:\text{OH}$ ) even as the concentration of  $\text{CH}_3\text{CHO}$  is varied. Taking an average of these three values, we

determine that for every  $\text{NH}_2$  radical that is removed by a  $\text{CH}_3\text{CHO}$  molecule, only 0.027 OH radicals are produced. There is one further correction to make to this number when determining the  $\text{CH}_3\text{CO}$  yield from R1 (i.e. the branching ratio for reaction R1a), and that is to account for the non-unity conversion of  $\text{CH}_3\text{CO}$  with  $\text{O}_2$  to OH. We determined an OH yield from  $\text{CH}_3\text{CO} + \text{O}_2$  of 0.94 (see main text, Section 3.3). Accounting for this, we determine a  $\text{CH}_3\text{CO}$  yield from R1 of 0.029. The most significant error in this calculation is in the rate coefficient for  $\text{NH}_2 + \text{CH}_3\text{CHO}$ , which has an error of almost 50 %. As we expect the other errors to be significantly smaller than this (such as the errors in the absorbance cross-sections and in the determination of the tBuOOH concentration), we assign the  $\text{CH}_3\text{CO}$  yield from R1 at  $T = 67.1$  K and  $[\text{N}_2] = 2.50 \times 10^{16}$  molecule  $\text{cm}^{-3}$  as  $0.029 \pm 0.014$ .

Using the same procedure we have determined the yield of  $\text{CH}_3\text{CO}$  from the experiments carried out in He, at  $T = 35.0$  K.

1. The OH LIF signal is calibrated using a known concentration of tBuOOH ( $1.06 \times 10^{12}$  molecule  $\text{cm}^{-3}$ ), and its absorption cross-section at 213 nm ( $\sigma = 8.5 \times 10^{-20}$   $\text{cm}^2$  molecule $^{-1}$ ).<sup>35</sup>

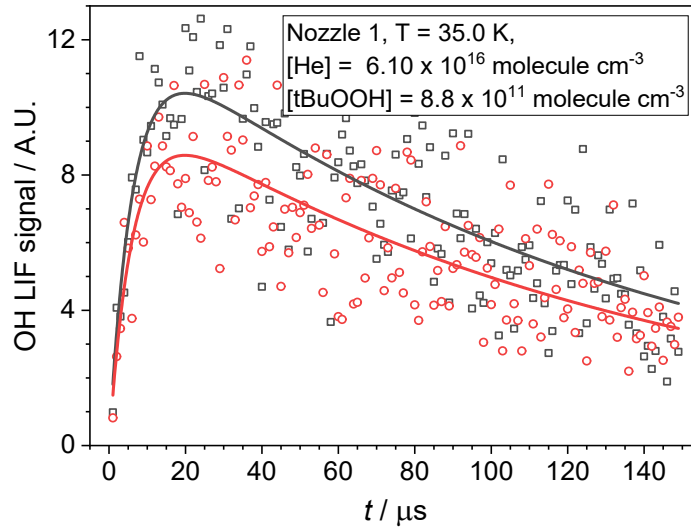

$f_{\text{OH}}$ , the observed OH fluorescence signal, is extracted from a bi-exponential fit to the OH LIF signal. From the above figure, using the equation below, we extract an  $f_{\text{OH}} = 11.0$  A.U. Black and red traces are repeats of the same experiment.

$$[\text{OH}]_t = f_{\text{OH}} \left( \frac{k'_{\text{growth}}}{k'_{\text{loss}} - k'_{\text{growth}}} \right) [\text{OH}^*]_0 \left( e^{-k'_{\text{growth}} t} - e^{-k'_{\text{loss}} t} \right) + [\text{OH}]_0 e^{-k'_{\text{loss}} t}$$

$$\text{Product of } [\text{tBuOOH}] \times \sigma(\text{tBuOOH}) = n \cdot \sigma \text{ tBuOOH} = 7.50 \times 10^{-8} \text{ cm}^{-1}.$$

2. Get  $f_{\text{OH}}$  from the OH yield experiments in which  $\text{NH}_3$  is photolysed in the presence of  $\text{CH}_3\text{CHO}$  and  $\text{O}_2$ , again from a bi-exponential fit to the data. Same conditions as above

407 (Nozzle 1,  $T = 35.0$  K,  $[\text{He}] = 6.13 \times 10^{16}$  molecule  $\text{cm}^{-3}$ , same photolysis energy and  
 408 PMT settings).

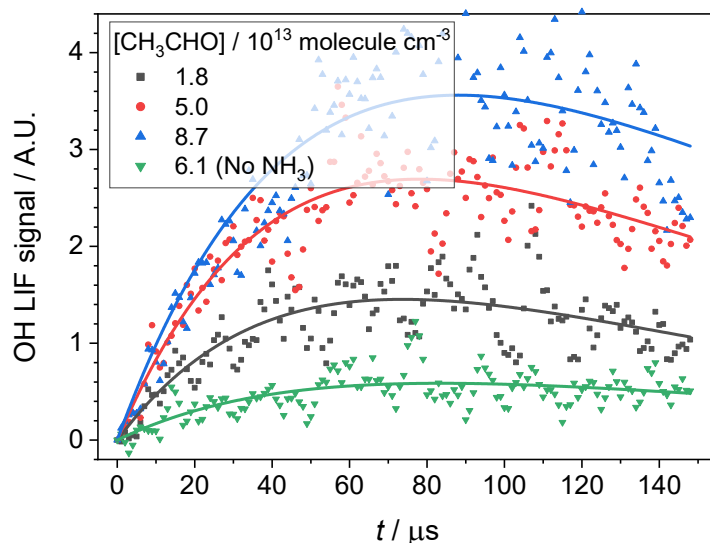

409  
 410 Can compare these  $f_{\text{OH}}$  values to that from tBuOOH and calculate an effective  
 411 [tBuOOH] that would give this signal, and calculate effective  $n \cdot \sigma$  tBuOOH.

412

| $[\text{CH}_3\text{CHO}] / \times 10^{13}$<br>molecule $\text{cm}^{-3}$ | $f_{\text{OH}}$ | Ratio $f_{\text{OH}}$ from $\text{NH}_2$ :<br>$f_{\text{OH}}$ from tBuOOH | Effective [tBuOOH] /<br>$\times 10^{11}$ molecule $\text{cm}^{-3}$ | $n \cdot \sigma$ tBuOOH<br>/ $\times 10^{-8} \text{ cm}^{-1}$ |
|-------------------------------------------------------------------------|-----------------|---------------------------------------------------------------------------|--------------------------------------------------------------------|---------------------------------------------------------------|
| 1.80                                                                    | 3.88            | 0.35                                                                      | 3.11                                                               | 2.65                                                          |
| 5.00                                                                    | 6.00            | 0.55                                                                      | 4.82                                                               | 4.09                                                          |
| 8.70                                                                    | 8.36            | 0.76                                                                      | 6.71                                                               | 5.70                                                          |

413  
 414 3. Determine how much  $\text{NH}_2$  relates to each of these OH signals. This can be estimated  
 415 from the concentration of  $\text{NH}_3$  in our experiments its absorbance cross-section at 213  
 416 nm ( $\sigma = 2.0 \times 10^{-18}$   $\text{cm}^2$  molecule $^{-1}$ ).<sup>35</sup> These experiments were carried out with  $[\text{NH}_3]$   
 417  $= 8.0 \times 10^{12}$  molecule  $\text{cm}^{-3}$ . Again we account for the reduction in  $\text{NH}_3$  by  $\text{CH}_3\text{CHO}$  by  
 418 looking at the reduction in the  $\text{NH}_2$  signal with  $\text{CH}_3\text{CHO}$  as compared to the  $\text{NH}_2$  signal  
 419 with no  $\text{CH}_3\text{CHO}$  (for experiments conducted under the same conditions, Nozzle 1,  $T$   
 420  $= 35.0$  K,  $[\text{He}] = 6.13 \times 10^{16}$  molecule  $\text{cm}^{-3}$ , same photolysis energy). This was done  
 421 by fitting a single exponential loss to the  $f_{\text{NH}_2}$  values, and using this fit to determine the  
 422 reduction in  $f_{\text{NH}_2}$  with  $\text{CH}_3\text{CHO}$ .

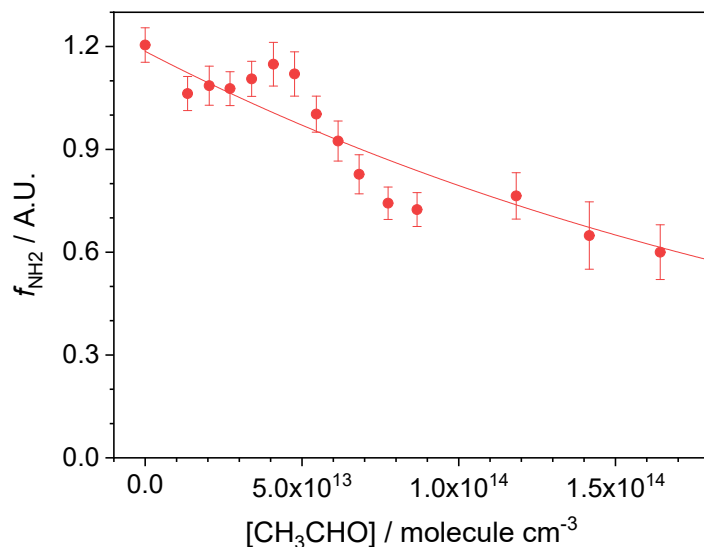

4. With both the concentration and absorption cross section of NH<sub>3</sub> we can calculate the n.σ product. Finally, comparing the n.σ products for tBuOOH and NH<sub>3</sub> we can determine the ratio of NH<sub>2</sub> radicals that were converted in OH radicals.

| [CH <sub>3</sub> CHO] / × 10 <sup>13</sup><br>molecule cm <sup>-3</sup> | Ratio NH <sub>2</sub> signal with<br>CH <sub>3</sub> CHO to without<br>CH <sub>3</sub> CHO | [NH <sub>3</sub> ] / × 10 <sup>12</sup><br>molecule cm <sup>-3</sup> | n.σ NH <sub>3</sub> / ×<br>10 <sup>-5</sup> cm <sup>-1</sup> | Ratio<br>NH <sub>2</sub> : OH |
|-------------------------------------------------------------------------|--------------------------------------------------------------------------------------------|----------------------------------------------------------------------|--------------------------------------------------------------|-------------------------------|
| 1.80                                                                    | 0.93                                                                                       | 7.44                                                                 | 1.49                                                         | 562:1                         |
| 5.00                                                                    | 0.82                                                                                       | 6.55                                                                 | 1.31                                                         | 320:1                         |
| 8.70                                                                    | 0.71                                                                                       | 5.65                                                                 | 1.13                                                         | 198:1                         |

5. Determine how much NH<sub>2</sub> in each experiment is actually removed by CH<sub>3</sub>CHO, rather than from diffusional losses. This can be determined from experiments observing the loss of NH<sub>2</sub> with CH<sub>3</sub>CHO, again conducted under the same conditions (T = 35.0 K, [He] = 6.13 × 10<sup>16</sup> molecule cm<sup>-3</sup>) from which we obtain a rate coefficient of k<sub>1</sub> = 3.69 × 10<sup>-11</sup> cm<sup>3</sup> molecule<sup>-1</sup> s<sup>-1</sup>. Using this we can correct the product of n.σ for NH<sub>3</sub>, and finally determine the ratio of NH<sub>2</sub> radicals that are removed by CH<sub>3</sub>CHO that were converted in OH radicals.

| [CH <sub>3</sub> CHO] / × 10 <sup>13</sup><br>molecule cm <sup>-3</sup> | k' diffusion<br>/ s <sup>-1</sup> | k' CH <sub>3</sub> CHO /<br>s <sup>-1</sup> | % NH <sub>2</sub> removal<br>with CH <sub>3</sub> CHO | Corrected n.σ<br>NH <sub>3</sub> / × 10 <sup>-7</sup> cm <sup>-1</sup> | Ratio NH <sub>2</sub> :<br>OH |
|-------------------------------------------------------------------------|-----------------------------------|---------------------------------------------|-------------------------------------------------------|------------------------------------------------------------------------|-------------------------------|
| 2.50                                                                    | 10500                             | 664                                         | 5.9                                                   | 8.9                                                                    | 33:1                          |
| 4.50                                                                    | 10500                             | 1845                                        | 14.9                                                  | 19.6                                                                   | 48:1                          |
| 7.00                                                                    | 10500                             | 3210                                        | 23.4                                                  | 26.4                                                                   | 46:1                          |

As can be seen from the above table, there is reasonable agreement in the amount of OH converted per NH<sub>2</sub> radical (the final column which is the ratio NH<sub>2</sub>:OH) even as the concentration of CH<sub>3</sub>CHO is varied. Taking an average of these three values, we

determine that for every  $\text{NH}_2$  radical that is removed by a  $\text{CH}_3\text{CHO}$  molecule, only 0.024 OH radicals are produced. Accounting for the non-unity conversion of  $\text{CH}_3\text{CO}$  with  $\text{O}_2$  to OH, we determine a  $\text{CH}_3\text{CO}$  yield from R1 of 0.026. The error in the rate coefficient for  $\text{NH}_2 + \text{CH}_3\text{CHO}$  at this temperature is significantly smaller than for the  $\text{N}_2$  case at 67.1 K, being only around 15 % (compared to almost 50 % for the  $\text{N}_2$  case). Errors in the absorbance cross sections used in this calculation, and in the determination of tBuOOH concentration are likely around 10 %. As such we assign the  $\text{CH}_3\text{CO}$  yield from R1 at  $T = 35.0$  K and  $[\text{He}] = 6.14 \times 10^{16}$  molecule  $\text{cm}^{-3}$  as  $0.026 \pm 0.008$ .

474 **Ab initio calculations of the  $\text{NH}_2 + \text{CH}_3\text{CHO}$  potential energy surface**

475

476 **Figure S7.** Optimised structures of the stationary points on the potential energy surface for  
477  $\text{NH}_2 + \text{CH}_3\text{CHO}$ , calculated at the M062X/aug-cc-pVTZ level of theory.

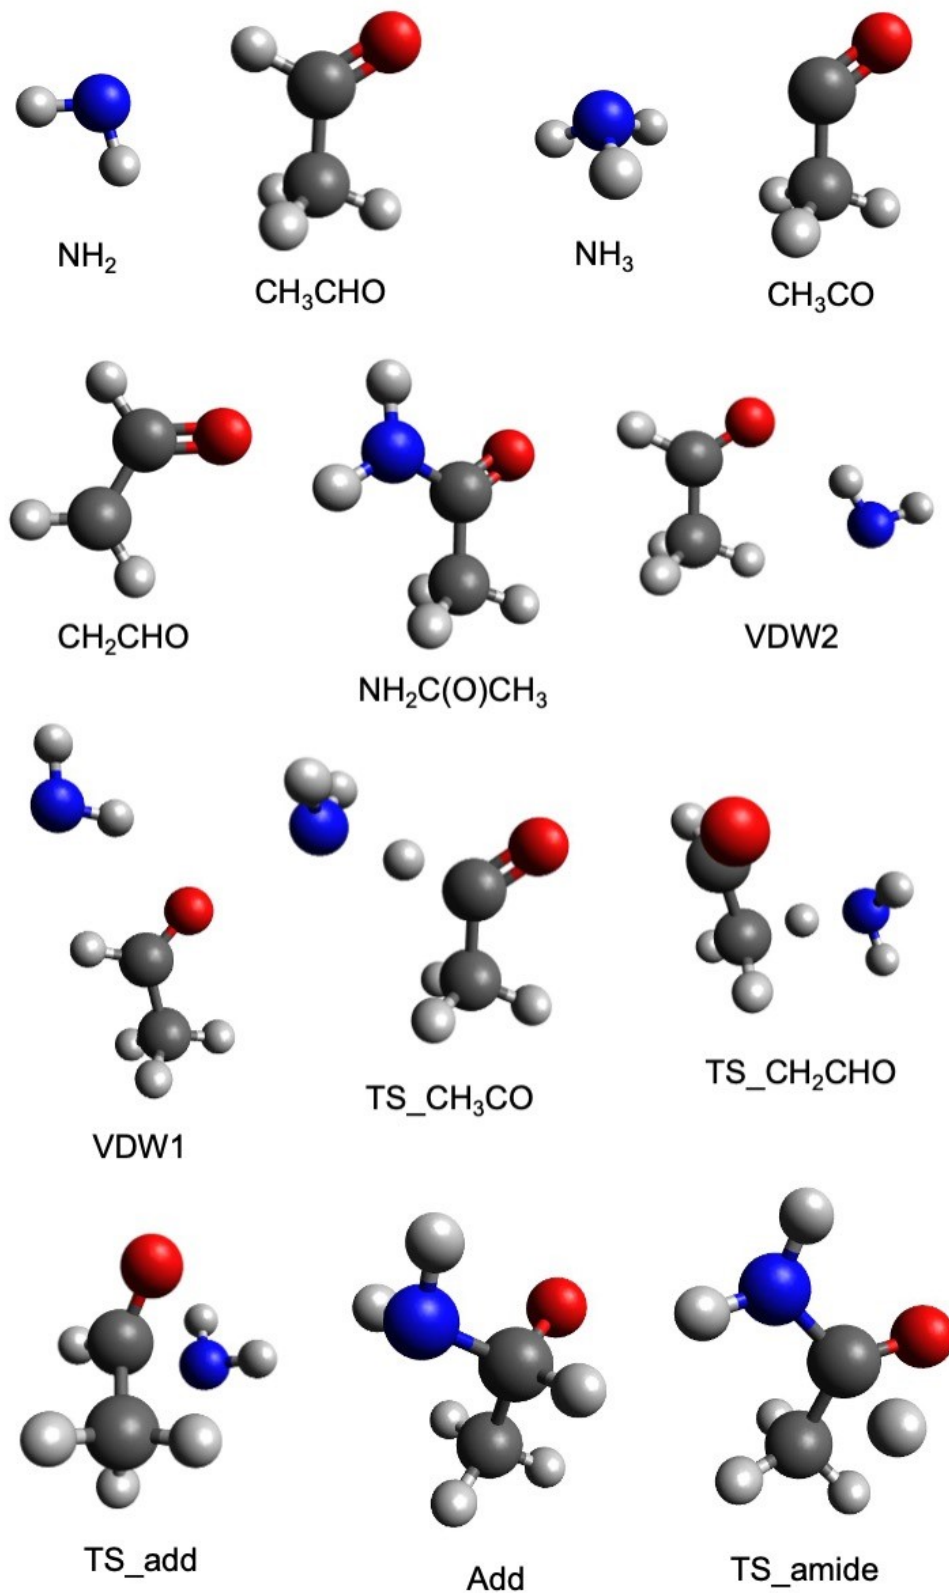

478

479 **Table S8.** Optimized geometries of the stationary points on the potential energy surface for  
 480  $\text{NH}_2 + \text{CH}_3\text{CHO}$  shown in Figure 7, calculated at the M062X/aug-cc-pVTZ level of theory.

481

| Molecule                     | Atom | (x, y, z) cartesian coordinates / Å |             |             |
|------------------------------|------|-------------------------------------|-------------|-------------|
| $\text{NH}_2$                | N    | -0.32996800                         | -0.74279100 | 0.02683100  |
|                              | H    | 0.03622300                          | -1.69829700 | -0.01951600 |
|                              | H    | 0.03623600                          | -0.30520600 | -0.82381200 |
| $\text{CH}_3\text{CHO}$      | C    | -0.38354600                         | 0.55805300  | 0.00919700  |
|                              | H    | 0.27434600                          | -0.29351400 | -0.17297800 |
|                              | H    | -0.39390600                         | 1.21803100  | -0.85356500 |
|                              | H    | -1.38166800                         | 0.15521600  | 0.18998100  |
|                              | C    | 0.08280500                          | 1.29322600  | 1.22909700  |
|                              | H    | 0.12602700                          | 0.69534800  | 2.15979200  |
|                              | O    | 0.39818600                          | 2.45080400  | 1.24355300  |
|                              |      |                                     |             |             |
| $\text{NH}_3$                | N    | -0.04248000                         | 0.12703500  | 0.00000200  |
|                              | H    | 0.33209300                          | -0.81320500 | -0.00000100 |
|                              | H    | 0.33210500                          | 0.59712000  | 0.81427900  |
|                              | H    | 0.33209300                          | 0.59712000  | -0.81428000 |
| $\text{CH}_3\text{CO}$       | C    | -1.13580300                         | 0.24273400  | -0.03370800 |
|                              | H    | -0.80890700                         | -0.77617300 | 0.17490600  |
|                              | H    | -0.75153600                         | 0.51553400  | -1.01679800 |
|                              | H    | -2.22561000                         | 0.31010700  | -0.01314000 |
|                              | C    | -0.52164800                         | 1.15743300  | 0.98734700  |
|                              | O    | -1.04697700                         | 1.88044200  | 1.74592900  |
| $\text{CH}_2\text{CHO}$      | C    | -1.89060400                         | 0.70618900  | 0.03088800  |
|                              | H    | -1.89387000                         | 1.31134800  | -0.86350600 |
|                              | H    | -2.31185700                         | -0.28748200 | 0.00961400  |
|                              | C    | -1.32467300                         | 1.24089300  | 1.22566200  |
|                              | H    | -1.33843900                         | 0.59529300  | 2.11771200  |
|                              | O    | -0.83922300                         | 2.36252300  | 1.28470600  |
| $\text{NH}_2\text{C(O)CH}_3$ | C    | 1.41838600                          | 0.81428300  | -1.04838300 |
|                              | H    | 1.66843500                          | -0.08890200 | -0.49484200 |
|                              | H    | 1.82153100                          | 1.68567300  | -0.54202200 |
|                              | H    | 1.87126800                          | 0.75126800  | -2.03802900 |
|                              | C    | -0.07235000                         | 0.99748400  | -1.21388000 |
|                              | O    | -0.58894700                         | 2.08841700  | -1.31078200 |
|                              | N    | -0.79811800                         | -0.15357800 | -1.27370500 |
|                              | H    | -0.37160000                         | -1.05831300 | -1.20988500 |
|                              | H    | -1.78788300                         | -0.08566700 | -1.43630600 |
|                              |      |                                     |             |             |
| VDW1                         | C    | -0.41613300                         | 0.67822400  | 0.10560600  |
|                              | H    | -0.48282500                         | -0.41065600 | 0.07253100  |
|                              | H    | 0.23359700                          | 0.97978200  | -0.71785400 |
|                              | H    | -1.40138100                         | 1.12119200  | -0.00806600 |
|                              | C    | 0.20636000                          | 1.09378400  | 1.40127200  |
|                              | H    | 1.21482300                          | 0.69562700  | 1.61218100  |
|                              | O    | -0.32636400                         | 1.82066300  | 2.20037300  |
|                              | N    | 2.19704700                          | 1.47886500  | 3.87363800  |
|                              | H    | 2.46077800                          | 1.86522500  | 4.78361600  |
|                              | H    | 1.25893600                          | 1.85745000  | 3.69777800  |

|                        |   |             |             |             |
|------------------------|---|-------------|-------------|-------------|
| TS_CH <sub>3</sub> CO  | C | -0.11739000 | 0.67200100  | 0.38692600  |
|                        | H | 0.19495000  | -0.35803800 | 0.56073300  |
|                        | H | 0.68105900  | 1.15351900  | -0.17821300 |
|                        | H | -1.05658800 | 0.70719800  | -0.15900800 |
|                        | C | -0.24616300 | 1.36201500  | 1.71312900  |
|                        | H | 0.80188400  | 1.33006700  | 2.33604000  |
|                        | O | -1.21617100 | 1.88879100  | 2.15237100  |
|                        | N | 2.07080300  | 1.26995100  | 3.04615800  |
|                        | H | 1.69561000  | 0.88195500  | 3.91705000  |
|                        | H | 2.13684400  | 2.27269600  | 3.24589100  |
| VDW2                   | C | -0.52218400 | 0.35513300  | 0.14572000  |
|                        | H | -1.01590300 | 1.19734500  | -0.34309400 |
|                        | H | -1.28577200 | -0.41030900 | 0.29749800  |
|                        | H | 0.28200600  | -0.02807000 | -0.47708600 |
|                        | C | -0.01053000 | 0.80058500  | 1.47853600  |
|                        | H | -0.76894500 | 1.20496600  | 2.17462400  |
|                        | O | 1.14069200  | 0.74603300  | 1.82498900  |
|                        | N | 2.77683500  | -0.47848500 | -0.54456800 |
|                        | H | 3.78645500  | -0.64041100 | -0.50217400 |
|                        | H | 2.54303800  | -0.07101800 | 0.36823200  |
| TS_CH <sub>2</sub> CHO | C | -0.10764000 | 0.39719200  | 0.16087900  |
|                        | H | 1.04571200  | 0.01668300  | -0.16813400 |
|                        | H | -0.48761600 | 0.85240800  | -0.74888200 |
|                        | H | -0.64083000 | -0.49407300 | 0.47447100  |
|                        | C | 0.16493200  | 1.33488700  | 1.26895700  |
|                        | H | 0.34951300  | 2.38639500  | 0.98475000  |
|                        | O | 0.23991700  | 0.99606700  | 2.42380200  |
|                        | N | 2.21837600  | -0.64106900 | -0.26452700 |
|                        | H | 1.88221800  | -1.55288100 | -0.58631700 |
|                        | H | 2.38773300  | -0.78101800 | 0.73634600  |
| TS_Add                 | C | -1.80603000 | 0.75863600  | -0.04080000 |
|                        | H | -1.52573700 | -0.29139200 | -0.01488600 |
|                        | H | -1.53796400 | 1.17130500  | -1.01511800 |
|                        | H | -2.87977600 | 0.87060300  | 0.09638300  |
|                        | C | -1.06541200 | 1.54118300  | 1.01027500  |
|                        | H | 0.00443400  | 1.30057800  | 1.10627700  |
|                        | N | -1.56125400 | 0.54299600  | 2.64666400  |
|                        | H | -1.10027500 | 1.08119100  | 3.38452900  |
|                        | H | -2.55068500 | 0.79042300  | 2.73744900  |
|                        | O | -1.49033300 | 2.61664500  | 1.44938200  |
| Add                    | C | -1.81890300 | 0.75782800  | 0.04773300  |
|                        | H | -1.56658700 | -0.29900000 | 0.01401600  |
|                        | H | -1.49383600 | 1.25149900  | -0.86348500 |
|                        | H | -2.89905200 | 0.86474300  | 0.14473000  |
|                        | C | -1.13401200 | 1.37620000  | 1.27400800  |
|                        | H | -0.04681800 | 1.29015800  | 1.14542500  |
|                        | N | -1.50395200 | 0.65896200  | 2.47039400  |
|                        | H | -1.08806300 | 1.09169400  | 3.28533600  |
|                        | H | -2.50985500 | 0.67694000  | 2.59485400  |
|                        | O | -1.45195500 | 2.71314500  | 1.24714500  |

|                     |   |             |             |             |
|---------------------|---|-------------|-------------|-------------|
| TS <sub>amide</sub> | C | -1.92047200 | 0.81043400  | 0.06117600  |
|                     | H | -1.77713400 | -0.26631000 | 0.13042300  |
|                     | H | -1.41220300 | 1.19755200  | -0.81615100 |
|                     | H | -2.98777000 | 1.01907800  | -0.02035700 |
|                     | C | -1.40811200 | 1.53588500  | 1.29617200  |
|                     | H | 0.07874000  | 1.08467200  | 1.09404700  |
|                     | N | -1.77076300 | 0.93796900  | 2.49622400  |
|                     | H | -1.41522200 | 1.39321900  | 3.32225900  |
|                     | H | -1.79815700 | -0.06691200 | 2.53393900  |
|                     | O | -1.10194000 | 2.73657900  | 1.26242300  |

482

483 **Table S9.** Relative energies of the stationary points on the potential energy surface for NH<sub>2</sub> +  
484 CH<sub>3</sub>CHO shown in Figure 7. Electronic energies calculated at the CCSD(T)/aug-cc-  
485 pVTZ//M062X/aug-cc-pVTZ level of theory and zero-point energies at the M062X/aug-cc-  
486 pVTZ level of theory.

| Molecule                              | Relative energy / kJ mol <sup>-1</sup> |
|---------------------------------------|----------------------------------------|
| NH <sub>2</sub> + CH <sub>3</sub> CHO | 0                                      |
| PRC1                                  | -11.3                                  |
| TS1                                   | 17.3                                   |
| NH <sub>3</sub> + CH <sub>3</sub> CO  | -71.9                                  |
| PRC2                                  | -12.5                                  |
| TS2                                   | 38.7                                   |
| NH <sub>3</sub> + CH <sub>2</sub> CHO | -43.4                                  |
| TS3                                   | 22.4                                   |
| Adduct                                | -28.6                                  |
| TS4                                   | 23.4                                   |
| CH <sub>3</sub> CONH <sub>2</sub> + H | -30.1                                  |

487

488 **Table S10.** Rotational constants and unscaled vibrational frequencies of the stationary points  
489 on the potential energy surface for NH<sub>2</sub> + CH<sub>3</sub>CHO shown in Figure 7, calculated at the  
490 M062X/aug-cc-pVTZ level of theory.

| Molecule            | Rotational constants / GHz |           | Wavenumber / cm <sup>-1</sup> |           |           |           |
|---------------------|----------------------------|-----------|-------------------------------|-----------|-----------|-----------|
| NH <sub>2</sub>     | 712.93038                  | 387.58406 | 1531.5886                     | 3405.6604 | 3493.6840 |           |
|                     | 251.08298                  |           |                               |           |           |           |
| CH <sub>3</sub> CHO | 57.34273                   | 10.25604  | 163.0217                      | 513.5663  | 779.0266  | 900.9351  |
|                     | 9.19039                    |           | 1138.1867                     | 1146.0322 | 1381.6376 | 1430.3317 |
|                     |                            |           | 1466.0849                     | 1475.7589 | 1865.7796 | 2944.0370 |
|                     |                            |           | 3061.8928                     | 3124.6679 | 3177.7397 |           |
| NH <sub>3</sub>     | 299.87944                  | 299.86305 | 1031.9317                     | 1659.0495 | 1659.6365 | 3508.5788 |
|                     | 189.07759                  |           | 3633.1568                     | 3634.3644 |           |           |
| CH <sub>3</sub> CO  | 84.85115                   | 10.05365  | 97.5784                       | 468.9292  | 866.6931  | 955.3696  |
|                     | 9.51476                    |           | 1049.5196                     | 1353.0407 | 1459.2567 | 1461.8530 |
|                     |                            |           | 1985.8134                     | 3062.1509 | 3158.2204 | 3161.5624 |
| CH <sub>2</sub> CHO | 67.51344                   | 11.54901  | 455.4787                      | 509.7045  | 758.0600  | 981.9680  |
|                     | 9.86199                    |           | 990.3857                      | 1169.9461 | 1409.2589 | 1481.2105 |
|                     |                            |           | 1629.1315                     | 3004.7145 | 3176.0083 | 3290.8471 |

|                                     |          |         |         |            |           |           |           |          |
|-------------------------------------|----------|---------|---------|------------|-----------|-----------|-----------|----------|
| NH <sub>2</sub> C(O)CH <sub>3</sub> | 10.92316 | 9.35601 | 5.20205 | 31.7408    | 192.0489  | 430.6848  | 523.1225  | 558.1449 |
|                                     |          |         |         | 656.4375   | 862.9309  | 989.8007  | 1059.5074 |          |
|                                     |          |         |         | 1124.8236  | 1349.0716 | 1410.1745 | 1475.4682 |          |
|                                     |          |         |         | 1494.4322  | 1619.8078 | 1815.1507 | 3079.2226 |          |
|                                     |          |         |         | 3148.1184  | 3185.2431 | 3620.2650 | 3761.8716 |          |
| VDW1                                | 20.28384 | 2.72350 | 2.43694 | 55.6568    | 99.1263   | 112.9618  | 154.8242  | 155.7337 |
|                                     |          |         |         | 285.3817   | 293.7395  | 521.7478  | 788.9190  |          |
|                                     |          |         |         | 907.1814   | 1141.2044 | 1155.9669 | 1382.0418 |          |
|                                     |          |         |         | 1447.6286  | 1464.8835 | 1473.8642 | 1540.5115 |          |
|                                     |          |         |         | 1846.6502  | 2987.4797 | 3063.3513 | 3125.4053 |          |
|                                     |          |         |         | 3180.0175  | 3389.7937 | 3486.8190 |           |          |
| TS_CH <sub>3</sub> CO               | 9.77287  | 4.13050 | 3.00151 | -1200.8949 | 51.5501   | 82.6841   | 101.3744  |          |
|                                     |          |         |         | 209.8910   | 422.1135  | 612.8750  | 615.7110  |          |
|                                     |          |         |         | 800.4342   | 919.1571  | 932.2367  | 1131.7470 |          |
|                                     |          |         |         | 1249.9571  | 1367.7572 | 1397.0826 | 1460.4349 |          |
|                                     |          |         |         | 1464.5411  | 1535.3418 | 1909.5105 | 3068.4341 |          |
|                                     |          |         |         | 3139.6207  | 3176.9727 | 3407.0030 | 3495.5199 |          |
| VDW2                                | 10.27356 | 3.69276 | 2.76228 | 38.9721    | 66.4894   | 104.6598  | 145.9590  | 157.3993 |
|                                     |          |         |         | 286.0806   | 301.3625  | 527.0971  | 778.9759  |          |
|                                     |          |         |         | 905.1303   | 1149.6458 | 1151.9267 | 1386.6857 |          |
|                                     |          |         |         | 1434.5115  | 1467.6241 | 1480.0896 | 1540.7119 |          |
|                                     |          |         |         | 1852.8525  | 2954.3881 | 3058.4084 | 3120.6282 |          |
|                                     |          |         |         | 3174.8979  | 3390.0869 | 3486.7586 |           |          |
| TS_CH <sub>2</sub> CHO              | 13.03348 | 3.73154 | 3.17434 | -1763.6131 | 48.7993   | 96.5360   | 162.8539  |          |
|                                     |          |         |         | 378.8652   | 511.9414  | 599.6075  | 676.8147  |          |
|                                     |          |         |         | 864.3537   | 928.8687  | 967.2125  | 1115.0167 |          |
|                                     |          |         |         | 1144.6584  | 1324.2884 | 1391.7473 | 1419.9615 |          |
|                                     |          |         |         | 1459.3245  | 1543.0341 | 1813.1255 | 2965.6825 |          |
|                                     |          |         |         | 3124.2843  | 3214.9062 | 3411.4196 | 3501.3848 |          |
| TS_Add                              | 9.82481  | 7.05492 | 4.71539 | -441.3410  | 202.1770  | 209.0855  | 274.3182  |          |
|                                     |          |         |         | 392.1498   | 505.7420  | 683.0005  | 793.6056  |          |
|                                     |          |         |         | 885.7569   | 953.9560  | 1095.9959 | 1140.5138 |          |
|                                     |          |         |         | 1380.5501  | 1402.2874 | 1469.9607 | 1479.6699 |          |
|                                     |          |         |         | 1544.8232  | 1627.5916 | 2993.7140 | 3068.9930 |          |
|                                     |          |         |         | 3142.4992  | 3174.3743 | 3416.8154 | 3510.0638 |          |
| Add                                 | 9.85698  | 8.53711 | 5.21715 | 215.2174   | 249.4492  | 362.2812  | 418.5156  |          |
|                                     |          |         |         | 495.8771   | 843.4580  | 874.0290  | 896.9706  |          |
|                                     |          |         |         | 984.9806   | 1036.7524 | 1151.8491 | 1243.0039 |          |
|                                     |          |         |         | 1249.3068  | 1383.8119 | 1392.1951 | 1484.9125 |          |
|                                     |          |         |         | 1495.6467  | 1655.0698 | 3007.3603 | 3079.0880 |          |
|                                     |          |         |         | 3158.6738  | 3181.6867 | 3523.4833 | 3609.1511 |          |
| TS_amide                            | 10.03827 | 8.77972 | 5.13009 | -1138.4853 | 200.8816  | 387.5029  | 445.8028  |          |
|                                     |          |         |         | 496.0434   | 522.4663  | 593.1430  | 647.6512  |          |
|                                     |          |         |         | 695.5432   | 870.1973  | 988.1287  | 1062.8554 |          |
|                                     |          |         |         | 1138.5968  | 1316.7719 | 1395.3313 | 1474.4090 |          |
|                                     |          |         |         | 1486.0081  | 1610.6980 | 1652.7921 | 3075.2056 |          |
|                                     |          |         |         | 3148.5428  | 3186.5426 | 3589.4411 | 3712.3672 |          |

**Figure S11.** Fractional yield of the three product channels of the  $\text{NH}_2 + \text{CH}_3\text{CHO}$  reaction as a function of temperature at  $P = 1 \times 10^{-16}$  molecule  $\text{cm}^{-3}$ , with Ar bath gas. Calculated using the full  $\text{NH}_2 + \text{CH}_3\text{CHO}$  PES given in Figure 7.

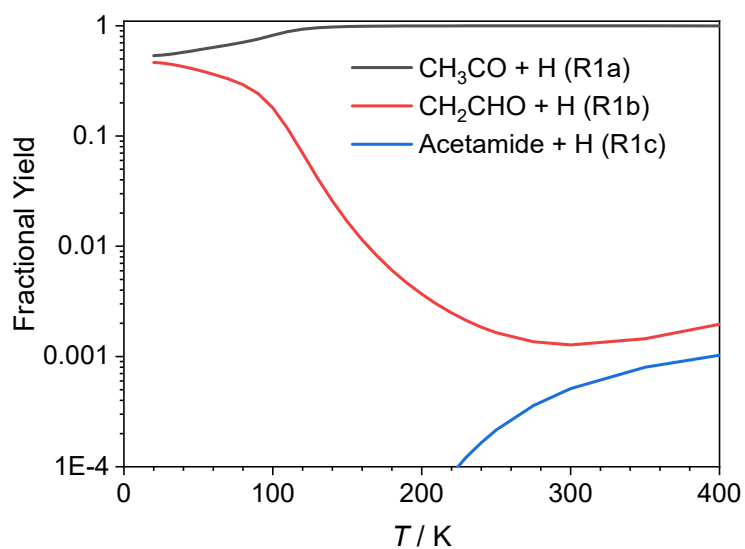

514 **Figure S12.** Reduced potential energy surface used for the fitting of experimental data, and  
 515 calculating the rate coefficients given in Figure Sxxx by MESMER.

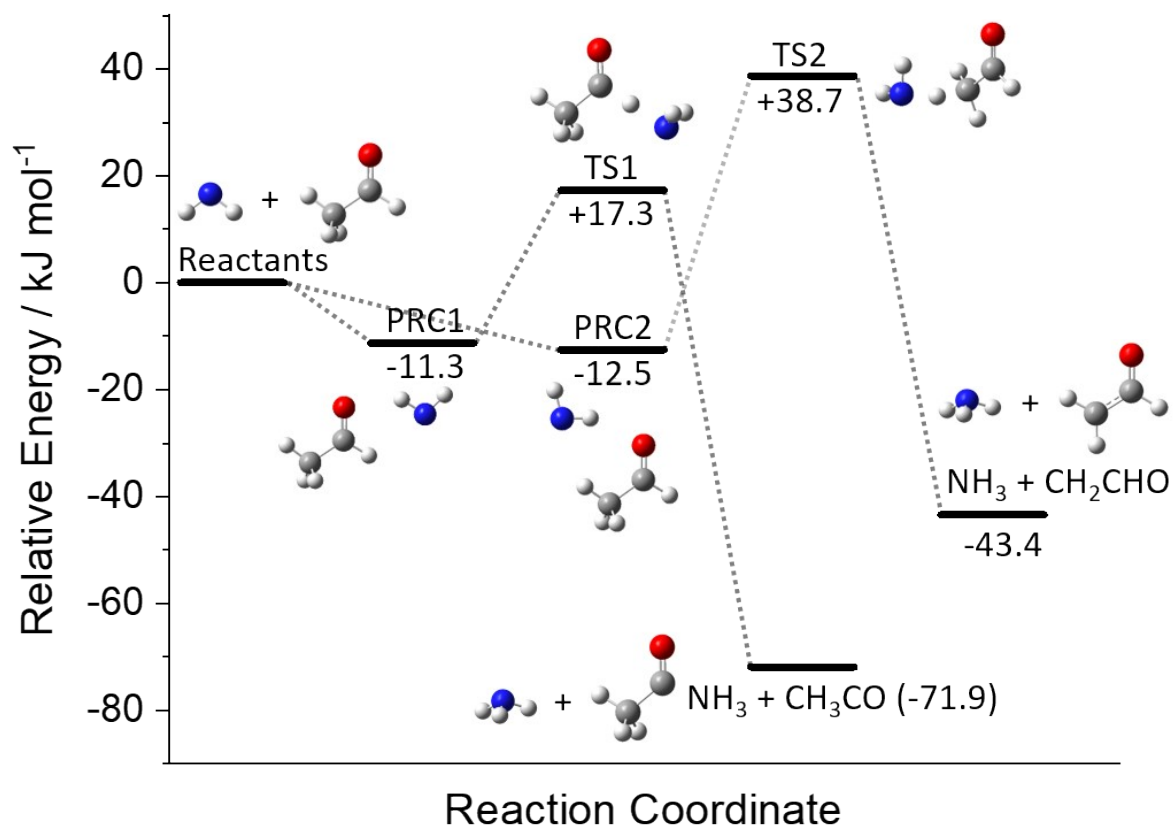

530 **Figure S13.** Experimental and theoretical rate coefficients for reaction R1. The theoretical rate  
 531 coefficients predicted by MESMER were carried out using the reduced PES shown in Figure  
 532 S9, with Ar as the third body at  $1 \times 10^{17}$  molecule  $\text{cm}^{-3}$ . The red diamonds give the results from  
 533 a vibration only calculation, while the blue triangles give the results when hindered rotors are  
 534 included in the calculation, which changes the density of states. Black circles are the  
 535 experimental results collected in Ar bath gas in this study (those collected at  $\sim 1 \times 10^{17}$   
 536 molecule  $\text{cm}^{-3}$ ), while the solid green line is the experimental results from <sup>28</sup> (ref xxx).

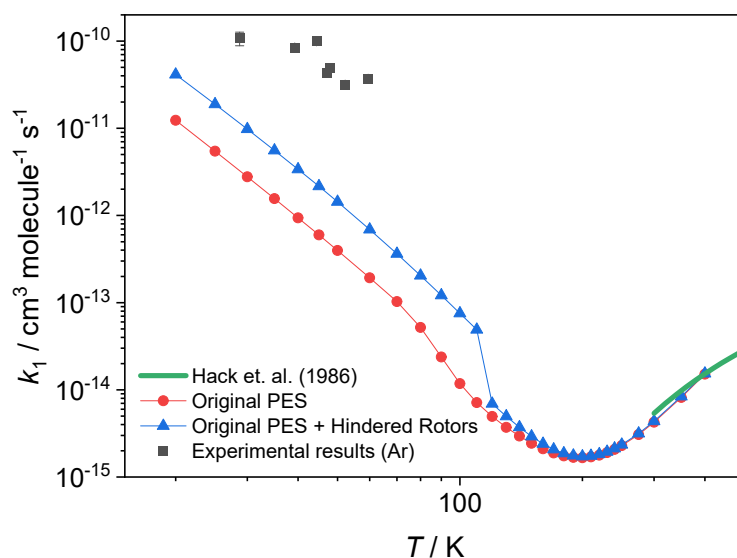

537  
 538  
 539  
 540  
 541  
 542  
 543  
 544  
 545  
 546  
 547  
 548  
 549  
 550  
 551  
 552

553 **Figure S14.** Internal rotations in  $\text{CH}_3\text{CHO}$ , PRC1, PRC2, TS1, TS2, and  $\text{CH}_3\text{CO}$  that are  
 554 described with the hindered rotor approach.

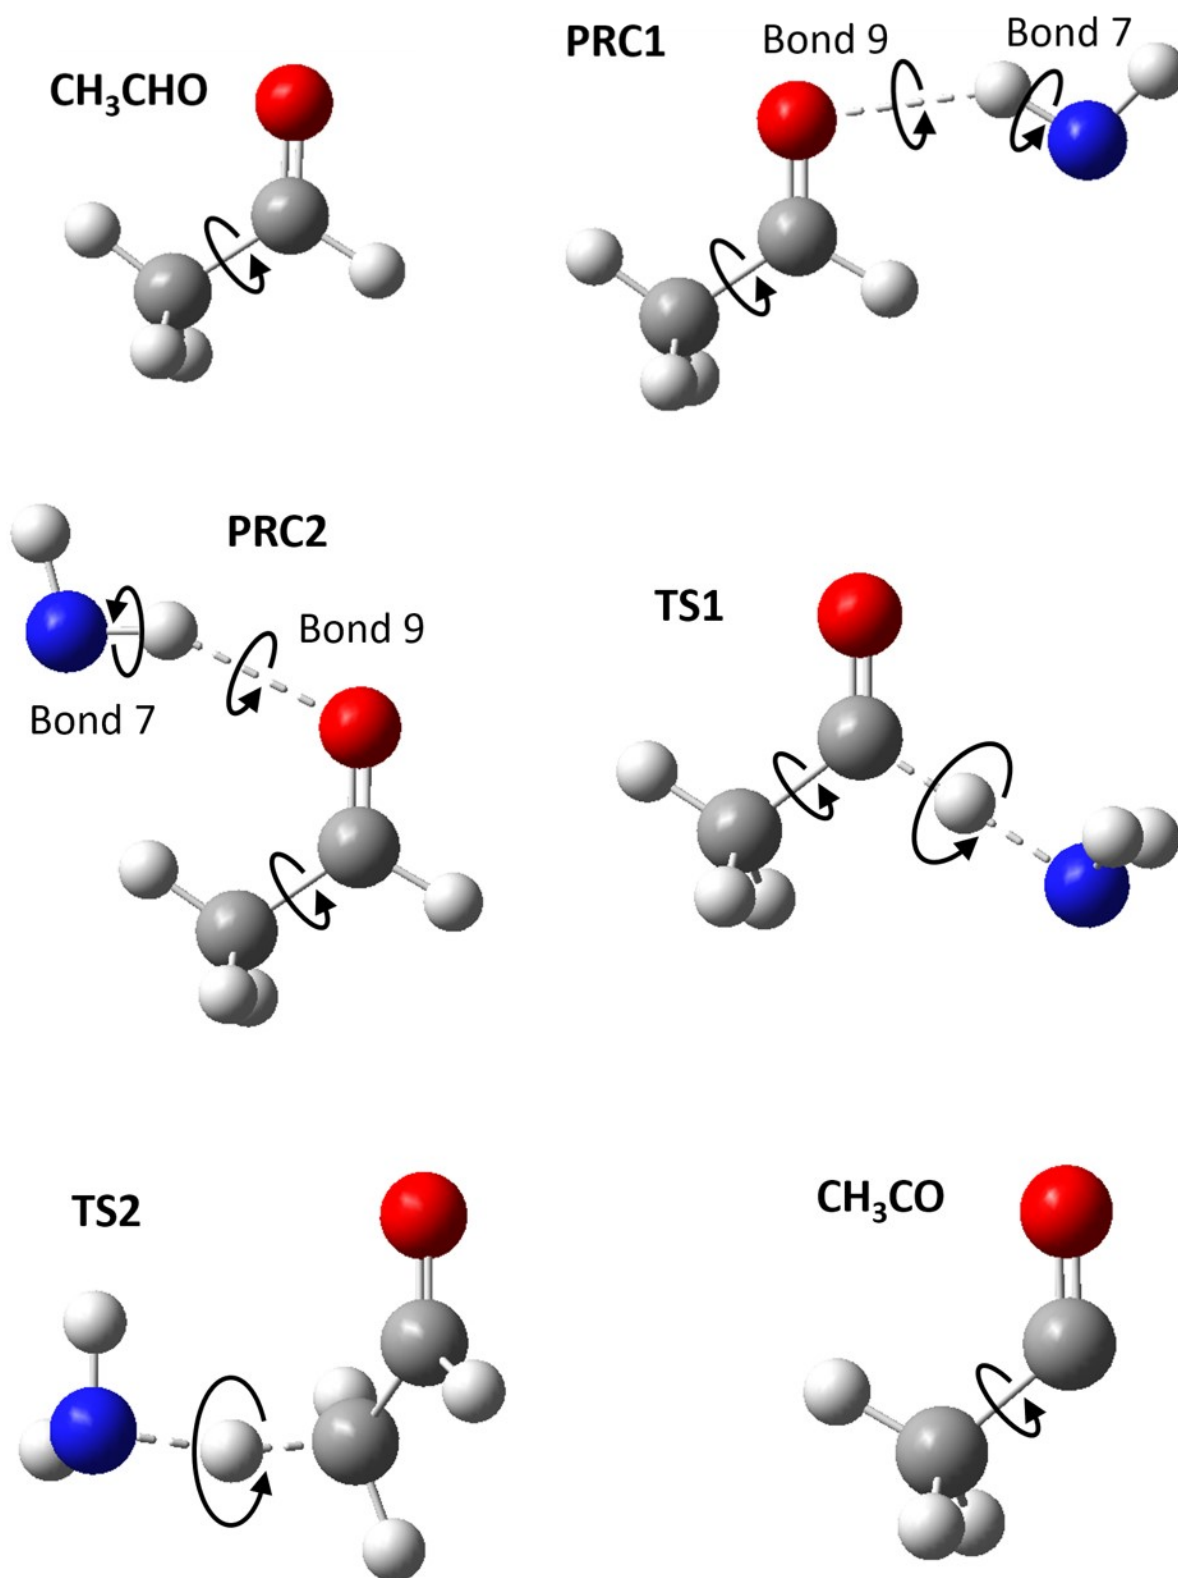

555

556

557 **Table S15.** Comparison of the calculated rate coefficients to the experimental values following  
558 fitting of the ZPEs of the PRCs to the experimental data.

559

| Bath Gas       | Temperature / K | Density /<br>molecule cm <sup>-3</sup> | Rate coefficient / cm <sup>3</sup> molecule <sup>-1</sup> s <sup>-1</sup> |             | % Difference |
|----------------|-----------------|----------------------------------------|---------------------------------------------------------------------------|-------------|--------------|
|                |                 |                                        | Experiment                                                                | Calculation |              |
| N <sub>2</sub> | 70.0            | 1.38E+16                               | 2.54E-12                                                                  | 1.94E-12    | 24 %         |
|                | 67.1            | 2.50E+16                               | 8.39E-12                                                                  | 3.78E-12    | 55 %         |
|                | 67.1            | 2.50E+16                               | 1.53E-11                                                                  | 3.78E-12    | 75 %         |
|                | 64.6            | 4.50E+16                               | 9.21E-12                                                                  | 7.05E-12    | 23 %         |
|                | 62.9            | 6.41E+16                               | 2.80E-11                                                                  | 1.02E-11    | 63 %         |
|                | 89.9            | 4.19E+16                               | 7.17E-12                                                                  | 1.93E-12    | 73 %         |
|                | 84.4            | 7.40E+16                               | 5.67E-12                                                                  | 4.01E-12    | 29 %         |
|                | 80.5            | 1.30E+17                               | 2.57E-11                                                                  | 7.63E-12    | 70 %         |
|                | 78.4            | 1.77E+17                               | 1.43E-11                                                                  | 1.08E-11    | 25 %         |
|                | 92.9            | 5.28E+16                               | 1.71E-12                                                                  | 2.07E-12    | 21 %         |
|                | 87.4            | 9.12E+16                               | 9.24E-12                                                                  | 4.19E-12    | 55 %         |
|                | 85.6            | 1.27E+17                               | 1.14E-11                                                                  | 5.97E-12    | 48 %         |
|                | 106.7           | 7.55E+16                               | 4.24E-12                                                                  | 1.63E-12    | 62 %         |
|                | 99.5            | 1.27E+17                               | 2.07E-12                                                                  | 3.38E-12    | 63 %         |
|                | 97.0            | 1.77E+17                               | 2.11E-12                                                                  | 4.94E-12    | 134 %        |
| Ar             | 34.2            | 2.06E+16                               | 3.77E-11                                                                  | 3.09E-11    | 18 %         |
|                | 30.3            | 3.41E+16                               | 5.82E-11                                                                  | 6.28E-11    | 8 %          |
|                | 28.7            | 6.17E+16                               | 1.08E-10                                                                  | 1.06E-10    | 2 %          |
|                | 52.2            | 6.22E+16                               | 3.17E-11                                                                  | 1.72E-11    | 46 %         |
|                | 47.0            | 1.12E+17                               | 4.37E-11                                                                  | 3.72E-11    | 15 %         |
|                | 39.3            | 1.65E+17                               | 8.46E-11                                                                  | 8.17E-11    | 3 %          |
|                | 41.6            | 2.82E+17                               | 9.88E-11                                                                  | 9.70E-11    | 2 %          |
|                | 47.9            | 6.24E+16                               | 4.89E-11                                                                  | 2.30E-11    | 53 %         |
|                | 44.4            | 1.12E+17                               | 9.95E-11                                                                  | 4.43E-11    | 55 %         |
|                | 43.3            | 1.59E+17                               | 1.16E-10                                                                  | 6.04E-11    | 48 %         |
|                | 59.4            | 8.82E+16                               | 3.70E-11                                                                  | 1.44E-11    | 61 %         |
|                | 54.2            | 1.50E+17                               | 6.28E-11                                                                  | 2.93E-11    | 53 %         |
|                | 52.4            | 2.05E+17                               | 9.69E-11                                                                  | 4.05E-11    | 58 %         |
| He             | 42.2            | 2.58E+16                               | 1.74E-11                                                                  | 1.45E-11    | 16 %         |
|                | 37.2            | 4.58E+16                               | 3.56E-11                                                                  | 3.37E-11    | 5 %          |
|                | 35.0            | 6.13E+16                               | 3.69E-11                                                                  | 5.02E-11    | 36 %         |
|                | 34.3            | 8.79E+16                               | 4.72E-11                                                                  | 6.72E-11    | 42 %         |
|                | 55.4            | 1.00E+17                               | 1.76E-11                                                                  | 1.56E-11    | 11 %         |
|                | 55.4            | 1.00E+17                               | 1.56E-11                                                                  | 1.56E-11    | 0 %          |
|                | 50.9            | 1.79E+17                               | 3.48E-11                                                                  | 3.19E-11    | 8 %          |
|                | 47.6            | 2.35E+17                               | 3.89E-11                                                                  | 4.76E-11    | 22 %         |
|                | 54.6            | 7.44E+16                               | 1.40E-11                                                                  | 1.31E-11    | 6 %          |
|                | 51.8            | 1.01E+17                               | 2.30E-11                                                                  | 1.98E-11    | 14 %         |
|                | 49.6            | 1.40E+17                               | 3.13E-11                                                                  | 2.91E-11    | 7 %          |
|                | 63.2            | 6.83E+16                               | 7.97E-12                                                                  | 7.20E-12    | 10 %         |
|                | 62.9            | 1.35E+17                               | 7.28E-12                                                                  | 1.26E-11    | 72 %         |
|                | 60.0            | 1.86E+17                               | 1.61E-11                                                                  | 1.89E-11    | 17 %         |

560 **Table S16.** Comparison of the calculated instant CH<sub>3</sub>CO yields to the experimental values  
 561 following fitting of the ZPEs of the H-abstraction TSs (TS1 and TS2) to the experimental data.  
 562

563

| Bath Gas       | Temperature /<br>K | Density /<br>molecule cm <sup>-3</sup> | Instant CH <sub>3</sub> CO yield |             | % Difference |
|----------------|--------------------|----------------------------------------|----------------------------------|-------------|--------------|
|                |                    |                                        | Experiment                       | Calculation |              |
| N <sub>2</sub> | 67                 | 2.5E+16                                | 0.029                            | 0.03050     | 5 %          |
| He             | 37                 | 4.6E+16                                | 0.026                            | 0.02557     | 2 %          |

564

565 **Figure S17.** Temperature and pressure dependent rate coefficients for the reaction between  
 566 NH<sub>2</sub> + CH<sub>3</sub>CHO (R1), as calculated by MESMER, using the PRC and TS energies determined  
 567 by fitting to the experimental data, and Ar as the bath gas. It should be noted that the high- and  
 568 low-pressure limiting rates will not be affected by the bath gas, however those in the pressure  
 569 dependent region will be.

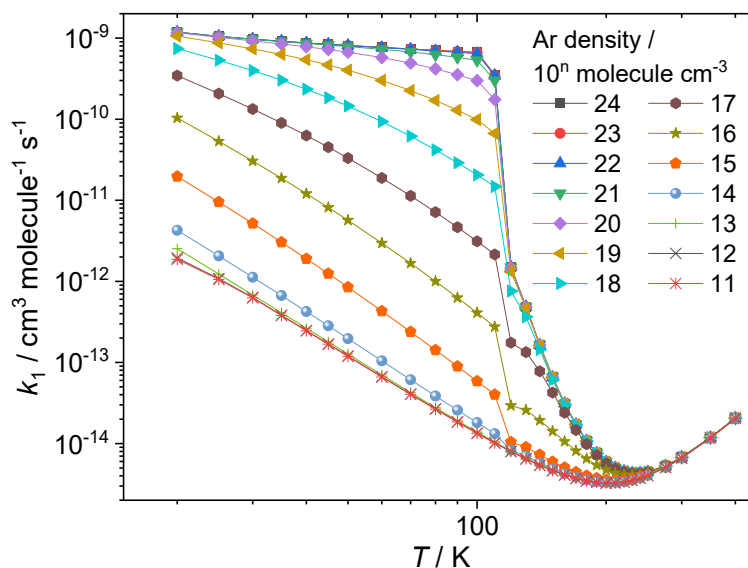

570

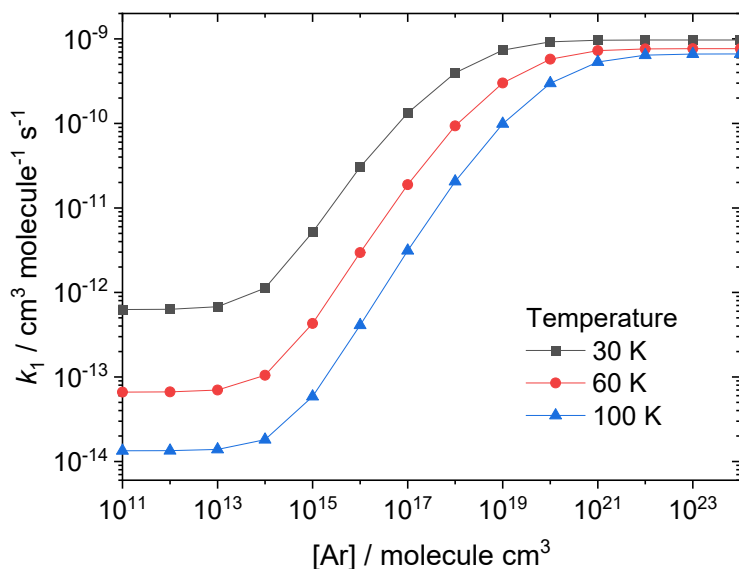

571

## 572 References.

- 573 1. Saladino, R.; Crestini, C.; Pino, S.; Costanzo, G.; Di Mauro, E. *Phys. Life Rev.*,2012, **9**, 84-  
574 104.
- 575 2. Rubin, R. H.; Swenson, G. W.; Benson, R. C.; Tigelaar, H. L.; Flygare, W. H.  
576 *Astrophysical Journal*,1971, **169**, L39-&.
- 577 3. Hollis, J. M.; Lovas, F. J.; Remijan, A. J.; Jewell, P. R.; Ilyushin, V. V.; Kleiner, I.  
578 *Astrophys. J.*,2006, **643**, L25-L28.
- 579 4. Herbst, E.;van Dishoeck, E. F., Complex Organic Interstellar Molecules. In *Annual Review*  
580 *of Astronomy and Astrophysics*, Vol 47, Blandford, R.; Kormendy, J.; VanDishoeck, E.,  
581 Eds. 2009; Vol. 47, pp 427-480.
- 582 5. McGuire, B. A. *Astrophys. J. Suppl. Ser.*,2022, **259**, 30.
- 583 6. Vasyunin, A. I.;Herbst, E. *Astrophys. J.*,2013, **769**, 9.
- 584 7. Heard, D. E. *Acc. Chem. Res.*,2018, **51**, 2620-2627.
- 585 8. Shannon, R. J.; Blitz, M. A.; Goddard, A.; Heard, D. E. *Nat. Chem.*,2013, **5**, 745-749.
- 586 9. Antinolo, M.; Agundez, M.; Jimenez, E.; Ballesteros, B.; Canosa, A.; El Dib, G.;  
587 Albaladejo, J.; Cernicharo, J. *Astrophys. J.*,2016, **823**.
- 588 10. Canosa, A. *Proc. Int. Astron. Union*,2019, **15**, 35-40.
- 589 11. Gomez Martin, J. C.; Caravan, R. L.; Blitz, M. A.; Heard, D. E.; Plane, J. M. C. *J. Phys.*  
590 *Chem. A*,2014, **118**, 2693-2701.
- 591 12. Ocana, A. J.; Blazquez, S.; Potapov, A.; Ballesteros, B.; Canosa, A.; Antinolo, M.;  
592 Vereecken, L.; Albaladejo, J.; Jimenez, E. *Phys. Chem. Chem. Phys.*,2019, **21**, 6942-6957.
- 593 13. Nguyen, T. L.; Ruscic, B.; Stanton, J. F. *J. Chem. Phys.*,2019, **150**.
- 594 14. Roncero, O.; Zanchet, A.; Aguado, A. *Phys. Chem. Chem. Phys.*,2018, **20**, 25951-25958.
- 595 15. Shannon, R. J.; Caravan, R. L.; Blitz, M. A.; Heard, D. E. *Phys. Chem. Chem. Phys.*,2014,  
596 **16**, 3466-3478.

- 597 16. Acharyya, K.; Herbst, E.; Caravan, R. L.; Shannon, R. J.; Blitz, M. A.; Heard, D. E. *Mol.*  
598 *Phys.*,2015, **113**, 2243-2254.
- 599 17. Sandford, S. A.; Nuevo, M.; Bera, P. P.; Lee, T. J. *Chem. Rev.*,2020, **120**, 4616-4659.
- 600 18. Altwegg, K.; Balsiger, H.; Bar-Nun, A.; Berthelier, J. J.; Bieler, A.; Bochsler, P.; Briois,  
601 C.; Calmonte, U.; Combi, M. R.; Cottin, H., et al. *Sci. Adv.*,2016, **2**.
- 602 19. Douglas, K. M.; Lucas, D. I.; Walsh, C.; West, N. A.; Blitz, M. A.; Heard, D. E. *Astrophys.*  
603 *J. Lett.*,2022, **937**.
- 604 20. Barone, V.; Latouche, C.; Skouteris, D.; Vazart, F.; Balucani, N.; Ceccarelli, C.; Lefloch,  
605 B. *Mon. Not. R. Astron. Sco.*,2015, **453**, L31-L35.
- 606 21. Skouteris, D.; Vazart, F.; Ceccarelli, C.; Balucani, N.; Puzzarini, C.; Barone, V. *Mon. Not.*  
607 *R. Astron. Sco.*,2017, **468**, L1-L5.
- 608 22. Vazart, F.; Calderini, D.; Puzzarini, C.; Skouteris, D.; Barone, V. *J. Chem. Theory*  
609 *Comput.*,2016, **12**, 5385-5397.
- 610 23. Song, L.; Kästner, J. *Phys. Chem. Chem. Phys.*,2016, **18**, 29278-29285.
- 611 24. Halfen, D. T.; Ilyushin, V.; Ziurys, L. M. *Astrophys. J.*,2011, **743**.
- 612 25. Altwegg, K.; Balsiger, H.; Berthelier, J. J.; Bieler, A.; Calmonte, U.; Fuselier, S. A.;  
613 Goesmann, F.; Gasc, S.; Gombosi, T. I.; Le Roy, L., et al. *Mon. Not. R. Astron. Sco.*,2017,  
614 **469**, S130-S141.
- 615 26. Goesmann, F.; Rosenbauer, H.; Bredehoft, J. H.; Cabane, M.; Ehrenfreund, P.; Gautier,  
616 T.; Giri, C.; Kruger, H.; Le Roy, L.; MacDermott, A. J., et al. *Sci.*,2015, **349**, aab0689.
- 617 27. Foo, L.; Suranyi, A.; Guljas, A.; Szori, M.; Villar, J. J.; Viskolcz, B.; Csizmadia, I. G.;  
618 Ragyanszki, A.; Fiser, B. *Mol. Astrophys.*,2018, **13**, 1-5.
- 619 28. Hack, W.; Kurzke, H.; Rouveirolles, P.; Wagner, H. G. *Ber. Bunsen Ges. Phys.*  
620 *Chem.*,1986, **90**, 1210-1219.
- 621 29. Taylor, S. E.; Goddard, A.; Blitz, M. A.; Cleary, P. A.; Heard, D. E. *Phys. Chem. Chem.*  
622 *Phys.*,2008, **10**, 422-437.
- 623 30. Caravan, R. L.; Shannon, R. J.; Lewis, T.; Blitz, M. A.; Heard, D. E. *J. Phys. Chem.*  
624 *A*,2015, **119**, 7130-7137.
- 625 31. Douglas, K.; Blitz, M. A.; Feng, W. H.; Heard, D. E.; Plane, J. M. C.; Slater, E.; Willacy,  
626 K.; Seakins, P. W. *Icarus*,2018, **303**, 10-21.
- 627 32. Douglas, K. M.; Blitz, M. A.; Feng, W.; Heard, D. E.; Plane, J. M. C.; Rashid, H.; Seakins,  
628 P. W. *Icarus*,2019, **321**, 752-766.
- 629 33. West, N. A.; Millar, T. J.; Van de Sande, M.; Rutter, E.; Blitz, M. A.; Decin, L.; Heard,  
630 D. E. *Astrophys. J.*,2019, **885**, 134.
- 631 34. Bull, S.; Seregennaja, I.; Tsherbakora, P. *Khim. Prom.(Moscow)*,1963, **7**, 507-509.
- 632 35. Keller-Rudek, H.; Moortgat, G. K.; Sander, R.; Sörensen, R. *Earth Syst. Sci. Data*,2013,  
633 **5**, 365-373.
- 634 36. Copeland, R. A.; Crosley, D. R.; Smith, G. P. In *Laser-induced fluorescence spectroscopy*  
635 *of NCO and NH2 in atmospheric pressure flames*, Symposium (International) on  
636 Combustion, Elsevier: 1985; pp 1195-1203.
- 637 37. Donnelly, V. M.; Baronavski, A. P.; McDonald, J. R. *Chem. Phys.*,1979, **43**, 271-281.

- 638 38. Yamasaki, K.; Watanabe, A.; Kakuda, T.; Itakura, A.; Fukushima, H.; Endo, M.;  
639 Maruyama, C.; Tokue, I. *J. Phys. Chem. A*, 2002, **106**, 7728-7735.
- 640 39. Limão-Vieira, P.; Eden, S.; Mason, N. J.; Hoffmann, S. V. *Chem. Phys. Lett.*, 2003, **376**,  
641 737-747.
- 642
- 643
